# Supplementary material
Source: Royal Society of Chemistry journal article supplement (doi:10.1039/d6ob00496b)
Supplement: d6ob00496b1.pdf [file d6ob00496b1.pdf]

## Supporting Information

### Re-investigation of HExxH enzyme DarF reveals a dehydrogenation-epoxidation reactions

Jabal Rahmat Haedar,<sup>a</sup> Nils Böhringer,<sup>b</sup> Gaja Swarna Kumari,<sup>a</sup> Vic Kiselov,<sup>a</sup> Viktors Romanuks,<sup>a</sup> Gints Smits,<sup>ac</sup> Stefano Donadio,<sup>ad</sup> Till F. Schäberle,<sup>bef</sup> and Chin-Soon Phan,<sup>\*a</sup>

<sup>a</sup> Latvian Institute of Organic Synthesis, Aizkraukles Street 21, LV-1006 Riga, Latvia.

<sup>b</sup> Natural Product Research, Institute for Insect Biotechnology, Justus-Liebig-University Giessen, 35392 Giessen, Germany.

<sup>c</sup> Faculty of Natural Sciences and Technology, Riga Technical University, Paula Valdena 3, LV-1048, Riga, Latvia.

<sup>d</sup> NAICONs Srl, 20139 Milan, Italy.

<sup>e</sup> Fraunhofer Institute for Molecular Biology and Applied Ecology, Branch of Bioresources, Ohlebergsweg 12, 35392 Giessen, Germany.

<sup>f</sup> German Center for Infection Research (DZIF), Partner Site Giessen-Marburg-Langen, Ohlebergsweg 12, 35392 Giessen, Germany

\*Correspondence: Chin-Soon Phan, chinsoon@osi.lv

## Table of Contents

### Experimental section

|                          |                                                                                |
|--------------------------|--------------------------------------------------------------------------------|
| Figure S1                | SDS-PAGE of His <sub>6</sub> -DarF                                             |
| Figure S2                | Coexpression of His <sub>6</sub> -SUMO-DarA + DarE                             |
| Figure S3                | MS/MS data of <b>1</b>                                                         |
| Figure S4                | MS/MS data of <b>2</b>                                                         |
| Figure S5                | <i>In vitro</i> assay of His <sub>6</sub> -DarF                                |
| Figure S6                | <i>In vitro</i> assay of boiled His <sub>6</sub> -DarF                         |
| Figure S7                | MS/MS data of <b>3</b>                                                         |
| Figure S8                | MS/MS data of <b>4</b>                                                         |
| Figure S9                | Time-course <i>in vitro</i> assay of His <sub>6</sub> -DarF                    |
| Figure S10               | Enzyme concentration-dependent <i>in vitro</i> assay of His <sub>6</sub> -DarF |
| Figure S11               | Darobactin A ( <b>5</b> ) from <i>P. luteoviolacea</i> H33                     |
| Figure S12               | Dehydrodarobactin A ( <b>6</b> ) from <i>P. luteoviolacea</i> H33              |
| Figure S13               | Epoxidized darobactin A ( <b>7</b> ) from <i>P. luteoviolacea</i> H33          |
| Figure S14               | Top 20 DALI hits with DarF predicted structure as query                        |
| Figure S15               | Sequence alignment of DarF with MscH, SjiH and ChIH                            |
| Figure S16               | HExxH and PWRxxxRP motifs in structures of ChIH and DarF                       |
| Figure S17               | Reactions/phylogenetic tree of RiPP $\alpha$ KG-dependent enzymes              |
| Figure S18               | Representative examples of dehydro-lanthipeptides                              |
| Figure S19               | Dehydrogenation-epoxidation by $\alpha$ KG-dependent enzymes                   |
| Table S1                 | Gene sequences used in this study.                                             |
| Table S2                 | Amino acid sequences of protein/peptide used in this study.                    |
| Table S3                 | Strains used in this study.                                                    |
| Supplementary references |                                                                                |

## EXPERIMENTAL SECTION

**General.** Chemicals and reagents were purchased from either Merck or Sigma-Aldrich unless otherwise specified. Synthetic genes inserted into expression vectors were synthesized by the Twist Bioscience (<https://www.twistbioscience.com/>). Gene sequences used in this study are listed in Table S1. Trypsin protease was purchased from Merck. Antibiotics (kanamycin, spectinomycin and chloramphenicol) were purchased from GoldBio. *Escherichia coli* NiCo21(DE3) and DH5 $\alpha$  strains purchased from NEB were used for protein expression and plasmid preparation, respectively. Electroporation was carried out using a Bio-Rad MicroPulser. Terrific broth (TB) was purchased from Formedium. Luria broth (LB), Miller broth and agar were purchased from Carl Roth. SDS-PAGE, 4-20% polyacrylamide gel was purchased from GenScript. Protein marker, broad multi color pre-stained protein standard for SDS-PAGE was purchased from GenScript. The *E. coli* cells were lysed using a Hielscher Ultrasonics Sonotrode S26D7 Titanium 7mm. LC-MS experiments were performed on a Waters Acquity H-class UPLC System coupled to Waters QToF SYNAPT G2-Si Mass Spectrometer.

**Bioinformatic expansion of darobactin BGCs containing DarF.** To retrieve putative  $\alpha$ KG-dependent HExxH enzyme DarF sequences, Basic Local Alignment Search Tool Protein (BLASTP)<sup>1</sup> was performed in June 2025 on a non-redundant protein database in National Center for Biotechnology Information (NCBI) online database using DarF (WP\_063364329.1)<sup>2</sup> from *Pseudoalteromonas luteoviolacea* as query and 1E-5 as cutoff value for search. The putative darobactin precursor peptides were manually identified from the upstream regions of DarF. This resulted 12 homologous DarF enzymes linked to putative precursor peptides (Figure S1).

**Phylogenetic tree construction.** The  $\alpha$ KG-dependent enzymes in RiPP biosynthesis, Poyl (AFS60645.1),<sup>3</sup> DurX (WP\_071962208.1),<sup>4</sup> CanE (KUN61407.1),<sup>5</sup> YhhC (WP\_003708570.1),<sup>6</sup> SmaO (WP\_141401631.1),<sup>7</sup> MscH<sub>429-768</sub> (WP\_013477425.1),<sup>8</sup> SjiH<sub>460-819</sub> (WP\_042453644.1),<sup>8</sup> ChIH<sub>376-722</sub> (WP\_016869186.1),<sup>8</sup> PfiC (WP\_192559974.1),<sup>9</sup> PosC (WP\_060837885.1),<sup>9</sup> ColD (WP\_033308454.1),<sup>10</sup> and DarF (WP\_063364329.1)<sup>2</sup> were used to generate a phylogenetic tree. A multi-sequence alignment of these proteins generated with Clustal Omega was used to build a phylogenetic tree at EMBL-EBI platform.<sup>11</sup> The C-terminal HExxH domains in MscBH, SjiBH and ChIBH are referred to as Msch, Sjih and ChIH, respectively.

**Transformation of plasmids into *E. coli* NiCo21(DE3).** Plasmids containing precursor and rSAM genes were obtained from Twist Bioscience and dissolved in MilliQ grade water to a final concentration of 10 ng/ $\mu$ L. 70  $\mu$ L of *E. coli* NiCo21(DE3) electrocompetent cells were transformed in a 2 mm electroporation cuvette with either 1  $\mu$ L of plasmid DNA containing the precursor gene for the precursor-only expression or 1  $\mu$ L of plasmid DNA containing the precursor gene + 1  $\mu$ L of plasmid DNA containing the rSAM enzyme for the coexpression of the precursor and the rSAM enzyme. The transformed cells were then grown overnight at 37 °C on LB (Miller) agar supplemented with appropriate antibiotics at a final concentration of kanamycin 30  $\mu$ g/mL and/or spectinomycin 100  $\mu$ g/mL.

**Protein expression and purification of precursor peptides.** A colony from the transformation above was picked up by a toothpick and added to 3 mL TB medium supplemented with appropriate antibiotics in a 15 mL falcon tube. The 50 mL culture was grown overnight at 37°C and shaken at 250 rpm. The overnight culture was used to inoculate either 250 mL of antibiotic-supplemented TB media in a 1 L Erlenmeyer flask in a 1:100 (v:v) ratio. The cells were then grown at 37°C, 250 rpm until OD<sub>600 nm</sub> reached 1.8-2.4. The culture was then placed on ice water for 30 min and protein expression was induced by addition of IPTG at a 0.1 mM final concentration. After induction, the culture was shaken at 16°C, 250 rpm for 18 h. The cells were collected by centrifugation at 4000 rpm for 10 min. The denaturing lysis buffer (100 mM NaH<sub>2</sub>PO<sub>4</sub>, 10 mM Tris, 8 M Urea, 10 mM imidazole, pH 8) was added to cell pellets in a ratio of 3:1 (v:w). The cell pellets were reconstituted and lysed by sonication with a Titanium 7mm solid probe (20 sec on and 15 sec off for 25 cycles at 50% amplitude). After sonication, the cell debris was removed by centrifugation at 15,000 rpm for 15 min. HisPur Ni-NTA resin (0.7 mL) was added to ~15-20 mL of supernatant in a 50 mL falcon tube and gently shaken for 1 h to allow binding of the precursor peptide to the Ni-NTA resin. Peptide-bound Ni-NTA resin was then washed with denaturing lysis buffer (2 x 1 mL for 0.7 mL resin if this buffer was used to resuspend the cell pellet), NPI-20 (50 mM NaH<sub>2</sub>PO<sub>4</sub>, 300 mM NaCl, 20 mM imidazole, pH 8, 5 x 1 mL for 0.7 mL resin) and eluted with NPI-250 (50 mM NaH<sub>2</sub>PO<sub>4</sub>, 300 mM NaCl, 250 mM imidazole, pH 8, 2.5 mL for 0.7 mL resin). Elution fractions were desalted into 50 mM Tris buffer (pH 8.0) using PD Minitrap G-10 columns. The full-length His<sub>6</sub>-SUMO-precursor peptide obtained by coexpression of DarA + DarE was digested with 1 mg/mL trypsin (1:100, trypsin/eluant v:v) at 37°C for 16 h and analyzed by LC-MS to detect activity from the radical SAM enzyme DarE, while the undigested full-length His<sub>6</sub>-SUMO-precursor peptide was used as a substrate for the biochemical characterization of  $\alpha$ KG-dependent HExxH enzyme DarF.

**Protein expression and purification of HExxH enzyme DarF.** A colony from the transformation above was picked up by a toothpick and added to 5 mL TB medium supplemented with appropriate antibiotics in a 15 mL falcon tube. The 50 mL culture was grown overnight at 37°C and shaken at 250 rpm. The overnight culture was used to inoculate either 250 mL of antibiotic-supplemented TB media in a 1 L Erlenmeyer flask in a 1:100 (v:v) ratio. The cells were then grown at 37°C, 250 rpm until OD<sub>600 nm</sub> reached 1.8-2.4. The culture was then placed on ice water for 30 min and protein expression was induced by addition of IPTG at a 0.1 mM final concentration. After induction, the culture was shaken at 16°C, 250 rpm for 18 h. The cells were collected by centrifugation at 4000 rpm for 10 min. The non-denaturing buffer (50 mM NaH<sub>2</sub>PO<sub>4</sub>, 10 mM Tris, 10 mM imidazole, 300 mM NaCl, 10% glycerol, pH 8) was added to cell pellets in a ratio of 3:1 (v:w). The cell pellets were reconstituted and lysed by sonication with a Titanium 7mm solid probe (10 sec on and 15 sec off for 25 cycles at 30% amplitude). After sonication, the cell debris was removed by centrifugation at 15,000 rpm for 15 min. HisPur Ni-NTA resin (0.7 mL) was added to ~15-20 mL of supernatant in a 50 mL falcon tube and gently shaken for 1 h to allow binding of the precursor peptide to the Ni-NTA resin. Peptide-bound Ni-NTA resin was then washed with non-denaturing buffer (2 x 1 mL for 0.7 mL resin if this buffer was used to resuspend the cell pellet), NPI-20 (50 mM NaH<sub>2</sub>PO<sub>4</sub>, 300 mM NaCl, 20 mM imidazole, pH 8, 5 x 1 mL for 0.7 mL resin) and eluted with NPI-250 (50 mM NaH<sub>2</sub>PO<sub>4</sub>, 300 mM NaCl, 250 mM imidazole, pH 8, 2.5 mL for 0.7 mL resin). Elution fractions were desalted into 50 mM Tris buffer (pH 8.0) using PD Minitrap G-10 columns. Purified His<sub>6</sub>-DarF was determined by SDS-PAGE and subjected to *in vitro* assay.

**LC-MS conditions.** Data acquisition was performed using MestReNova at the following conditions.

Waters UPLC system Acquity H-class connected with Waters UV detector PDA eλ coupled with Waters TOF mass spectrometer SYNAPT G2-Si.

LC: column = Acquity BEH C18, 1.7 μm, 2.1 x 50 mm; mobile phase/gradient = solvent A: H<sub>2</sub>O + 0.1 % formic acid, solvent B: CH<sub>3</sub>CN, Initial – 95 % A, 1.5 min – 40 % A, 2.5 min – 2 % A, 3.5 min – 2 % A, 3.7 min – 95 % A, 6 min – 95 % A; flow rate = 0.4 mL/min; column temp. = 40 °C; Injection volume = 1 μL, Run time = 6 min

MS: polarity = positive; capillary voltage = +0.7 kV; cone voltage = 40.0 V; source temperature = 120 °C; desolvation temperature = 500 °C; cone gas flow = 30 L/h; desolvation gas flow = 800 L/h; collision energy = 4 V; mass range = *m/z* 250–2000; scan duration = 0.5 s; interscan delay = 0.025 s; data acquisition = continuum mode; Lockspray (Leucine enkephalin); scan duration = 1.0 s; interval = 10 scans.

MS/MS: polarity = positive; scan duration = 1.0 s; inter-scan delay = 0.025 s; data acquisition = continuum mode; mass range and collision energy are specified in the respective figure legends.

***In vitro* assay of DarF.** His<sub>6</sub>-DarF biochemical characterization was carried out in 50 mM Tris-HCl buffer (pH 8.0) with purified DarE modified full-length His<sub>6</sub>-precursor peptide (0.1 - 0.2 mM), 0.5 mM of Fe(SO<sub>4</sub>)<sub>2</sub>(NH<sub>4</sub>)<sub>2</sub>, 2 mM of αKG, 2 mM of ascorbate and 10 μM of enzyme His<sub>6</sub>-DarF in a reaction volume of 100 μL. For the negative control, enzyme His<sub>6</sub>-DarF was boiled by heating at 80 °C for 10 min. The reaction solution was incubated at 28 °C for 2 h and quenched with absolute methanol. After centrifugation at 15,000 rpm for 10 min, the products were then subjected to LC-MS analysis as mentioned above.

**Time-course *in vitro* assay of DarF.** His<sub>6</sub>-DarF biochemical characterization was carried out in 50 mM Tris-HCl buffer (pH 8.0) with purified DarE modified full-length His<sub>6</sub>-precursor peptide (50 μM), 0.5 mM of Fe(SO<sub>4</sub>)<sub>2</sub>(NH<sub>4</sub>)<sub>2</sub>, 2 mM of αKG, 2 mM of ascorbate and 1 μM of enzyme His<sub>6</sub>-DarF in a reaction volume of 1 mL. The reaction solution was incubated at 28 °C for 0, 1, 5, 30 and 60 min, then quenched with absolute methanol. After centrifugation at 15,000 rpm for 10 min, the products were then subjected to LC-MS analysis as mentioned above.

**Enzyme concentration-dependent *in vitro* assay of DarF.** His<sub>6</sub>-DarF biochemical characterization was carried out in 50 mM Tris-HCl buffer (pH 8.0) with purified DarE modified full-length His<sub>6</sub>-precursor peptide (50 μM), 0.5 mM of Fe(SO<sub>4</sub>)<sub>2</sub>(NH<sub>4</sub>)<sub>2</sub>, 2 mM of αKG, 2 mM of ascorbate and 1, 5, 10 and 20 μM of enzyme His<sub>6</sub>-DarF in a reaction volume of 150 μL. The reaction solution was incubated at 28 °C for 2 h, then quenched with absolute methanol. After centrifugation at 15,000 rpm for 10 min, the products were then subjected to LC-MS analysis as mentioned above.

**Chemical extraction of native producer *Pseudoalteromonas luteoviolacea* H33 of darobactin A and other analogues.** The wild-type strain *Pseudoalteromonas luteoviolacea* H33 was cultivated in M2 medium for 3 days at 30 °C and 180 ppm, as previously described.<sup>2</sup> Composition of M2 medium: KBr (0.1 g/L), MgCl<sub>2</sub>·6H<sub>2</sub>O (10.61 g/L), CaCl<sub>2</sub>·2H<sub>2</sub>O (1.47 g/L), KCl (0.66 g/L), SrCl<sub>2</sub>·6H<sub>2</sub>O (0.04 g/L), Na<sub>2</sub>SO<sub>4</sub> (3.92 g/L), NaHCO<sub>3</sub> (0.19 g/L), H<sub>3</sub>BO<sub>3</sub> (0.03 g/L), MOPS (40 mM), glucose (3.0 g/L), and casein (5.0 g/L). Subsequently, the cells were removed by centrifugation, and the supernatant was concentrated using a 0.5 g C18 SPE column and consecutive evaporation in a GeneVac centrifugal concentrator (SPScientific, Ipswich, UK). The concentrated crude extract was resuspended in 200 mL H<sub>2</sub>O + 0.1 % formic acid and analyzed by UPLC-HR-ESI-MS (Agilent Infinity 1290 UPLC system coupled with a DAD detector and a Bruker Daltonics micrOTOFQ II mass spectrometer equipped with electrospray ionization source).

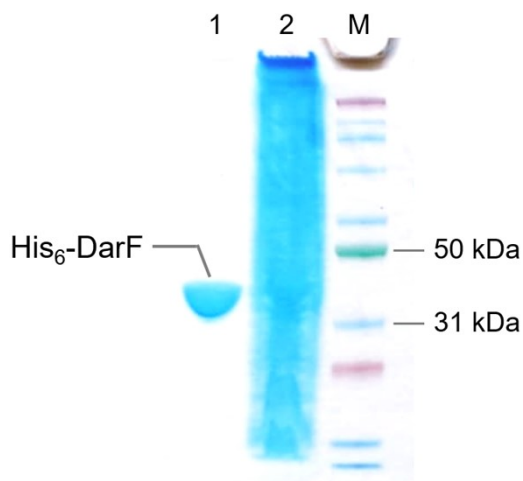

**Figure S1.** SDS-PAGE of His<sub>6</sub>-DarF. M: molecular weight marker. 1: *in vivo* expression of His<sub>6</sub>-DarF in *E. coli* NiCo21 (DE3) and Ni-affinity purification to obtain purified His<sub>6</sub>-DarF. 2: *in vivo* expression of His<sub>6</sub>-DarF in *E. coli* NiCo21 (DE3) and without Ni-affinity purification to obtain unpurified supernatant. Theoretical molecular weight of recombinant His<sub>6</sub>-DarF is 43.0 kDa.

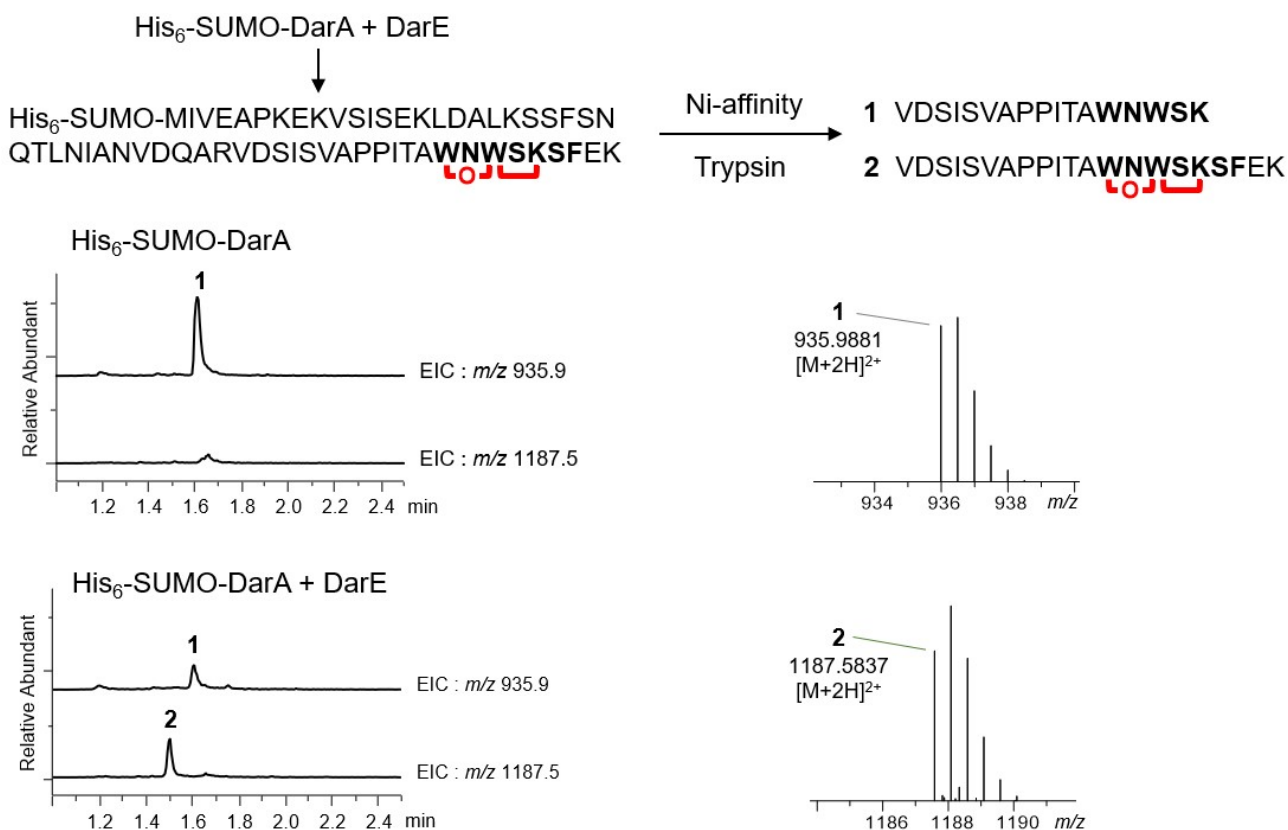

**Figure S2.** *In vivo* coexpression of His<sub>6</sub>-SUMO-DarA + DarE followed by Ni-affinity purification and trypsin digestion yielded fragments **1** and **2**. The EIC chromatogram and MS spectrum of fragments **1** and **2**. Core peptides are shown as bold letters. Cross-link formation on the peptide sequences is shown as red connectors.

| Ion | Fragment   | Calc.                    | Obs.      | error (ppm) |
|-----|------------|--------------------------|-----------|-------------|
| b2  | VD         | 215.1032                 | 215.1032  | 0.0930      |
| b3  | VDS        | 302.1352                 | 302.1324  | -9.3005     |
| b4  | VDSI       | 415.2193                 | 415.2187  | -1.3728     |
| b5  | VDSIS      | 502.2513                 | 502.2486  | -5.3758     |
| b6  | VDSISV     | 601.3197                 | 601.3179  | -3.0267     |
| b7  | VDSISVA    | 672.3568                 | 672.3558  | -1.5319     |
| b8  | VDSISVAP   | 769.4096                 | 769.411   | 1.8326      |
| b10 | VDSISVAPPI | 979.5464                 | 979.542   | -4.5123     |
| y1  |            | K 147.11335              | 147.1132  | -1.0196     |
| y2  |            | SK 234.14538             | 234.1445  | -3.7583     |
| y3  |            | WSK 420.22469            | 420.2233  | -3.3078     |
| y4  |            | NWSK 534.26762           | 534.2685  | 1.6471      |
| y5  |            | WNWSK 720.34693          | 720.3464  | -0.7358     |
| y6  |            | AWNWSK 791.38405         | 791.3864  | 2.9695      |
| y7  |            | TAWNWSK 892.43173        | 892.4323  | 0.6387      |
| y8  |            | ITAWNWSK 1005.51579      | 1005.5212 | 5.3803      |
| y9  |            | PITAWNWSK 1102.56855     | 1102.564  | -4.1267     |
| y10 |            | PPITAWNWSK 1199.62132    | 1199.6208 | -0.4335     |
| y11 |            | APPITAWNWSK 1270.65843   | 1270.6565 | -1.5189     |
| y12 |            | VAPPITAWNWSK 1369.72685  | 1369.7305 | 2.6648      |
| y13 |            | SVAPPITAWNWSK 1456.75887 | 1456.7517 | -4.9219     |

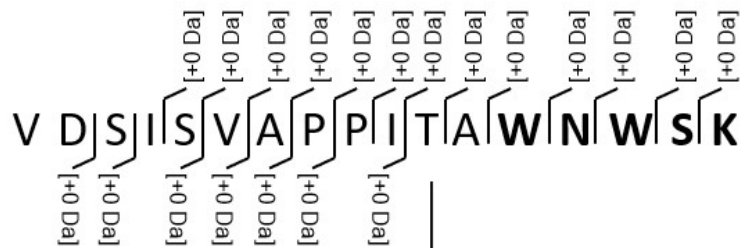

MS/MS<sup>+</sup> of 1

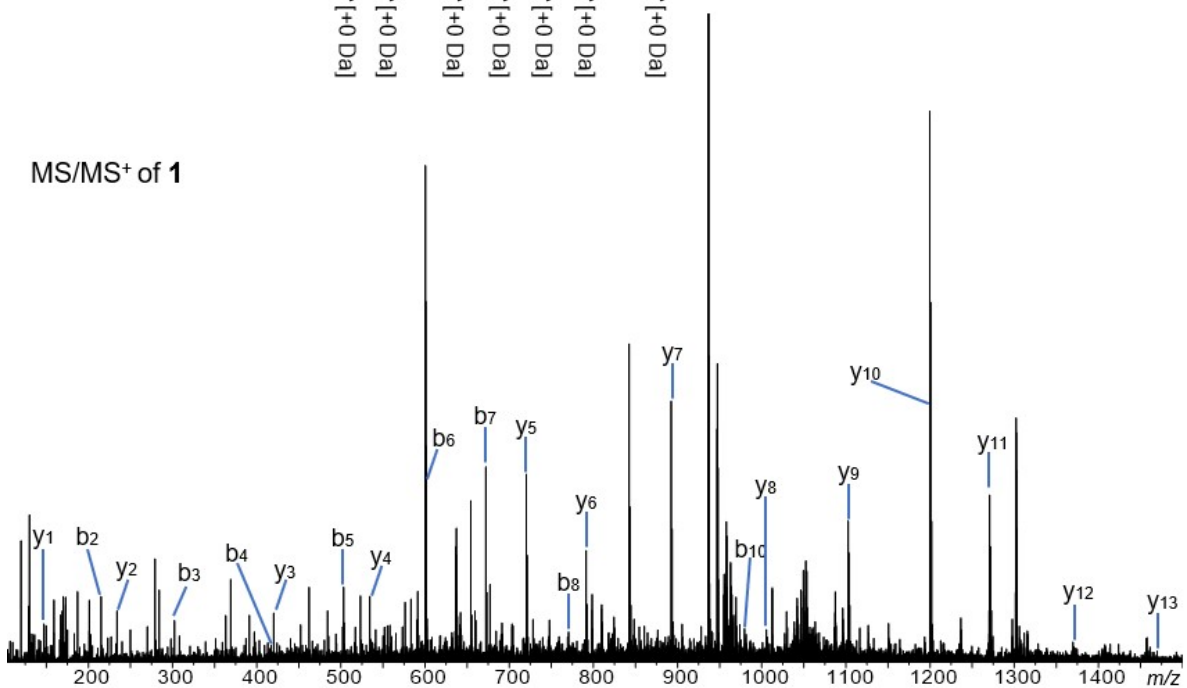

**Figure S3.** The MS/MS spectrum of fragment 1.

| Ion | Fragment                | Calc.      | Obs.      | error (ppm) |
|-----|-------------------------|------------|-----------|-------------|
| b2  | VD                      | 215.10318  | 215.1021  | -5.0208     |
| b3  | VDS                     | 302.13521  | 302.134   | -4.0048     |
| b5  | VDSIS                   | 502.2513   | 502.2457  | -11.1498    |
| b6  | VDSISV                  | 601.31972  | 601.3139  | -9.6787     |
| b7  | VDSISVA                 | 672.35683  | 672.3551  | -2.5730     |
| b8  | VDSISVAP                | 769.40959  | 769.4064  | -4.1460     |
| b10 | VDSISVAPPI              | 979.54642  | 979.5195  | -27.4821    |
| b12 | VDSISVAPPITA            | 1151.63121 | 1151.6218 | -8.1710     |
| y1  | K                       | 147.11335  | 147.1128  | -3.7386     |
| y2  | EK                      | 276.15595  | 276.1356  | -73.6902    |
| y3  | FEK                     | 423.22436  | 423.2187  | -13.3735    |
| y4  | SFEK                    | 510.25639  | 510.2535  | -5.6638     |
| y9  | WNWSKSFEK [+12 Da]      | 1223.54855 | 1223.5455 | -2.4927     |
| y10 | AWNWSKSFEK [+12 Da]     | 1294.58566 | 1294.5792 | -4.9900     |
| y11 | TAWNWSKSFEK [+12 Da]    | 1395.63334 | 1395.6321 | -0.8885     |
| y12 | ITAWNWSKSFEK [+12 Da]   | 1508.7174  | 1508.7268 | 6.2305      |
| y13 | PITAWNWSKSFEK [+12 Da]  | 1605.77017 | 1605.7687 | -0.9154     |
| y14 | PPITAWNWSKSFEK [+12 Da] | 1702.82293 | 1702.8099 | -7.6520     |

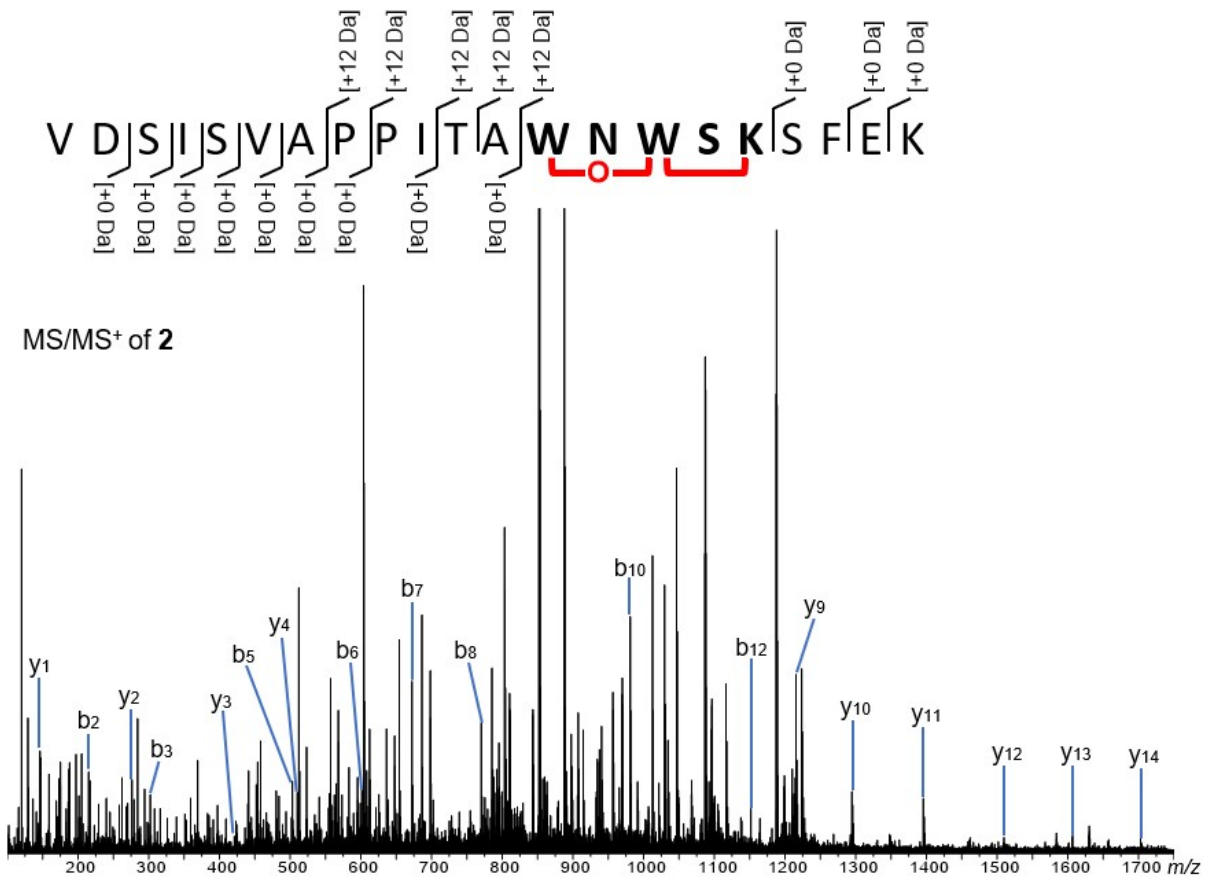

**Figure S4.** The MS/MS spectrum of fragment 2.

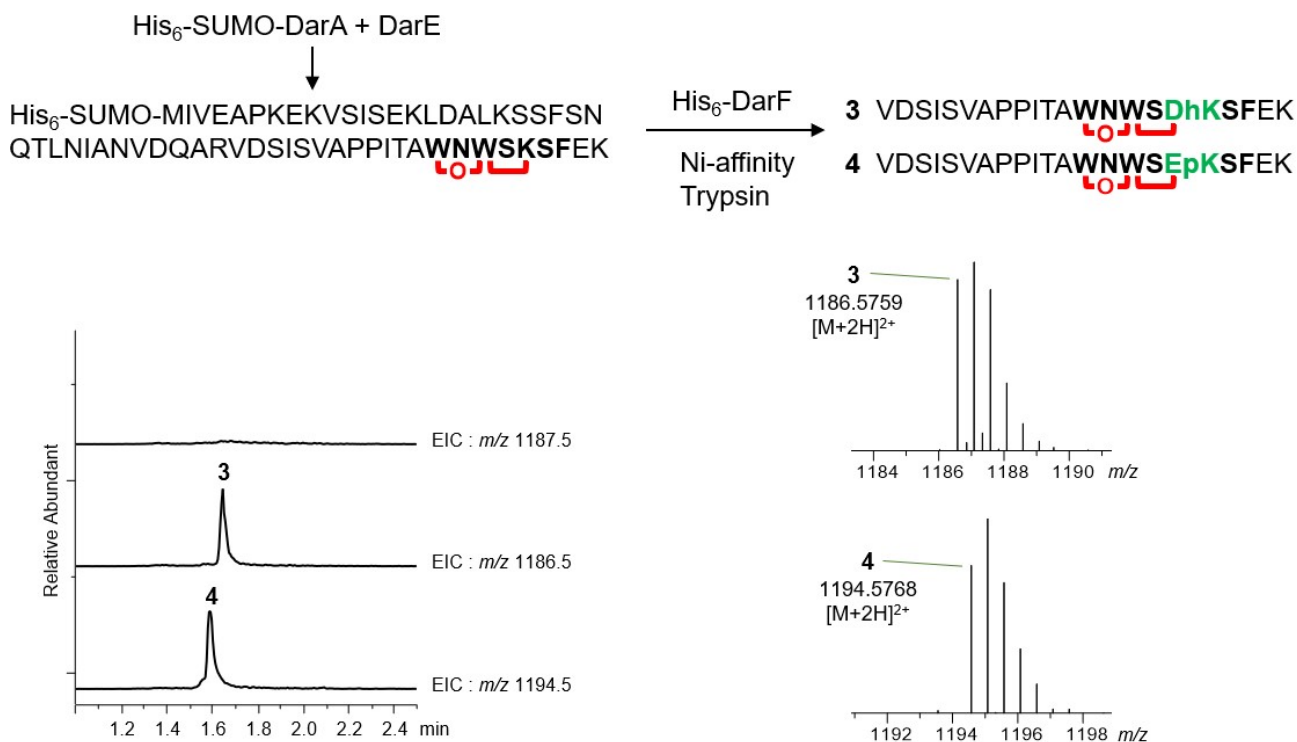

**Figure S5.** *In vitro* assay of His<sub>6</sub>-DarF + modified full-length His<sub>6</sub>-SUMO-DarA. The EIC chromatogram and MS spectra of fragments **3** and **4**. Core peptides are shown as bold letters. Cross-link and DarF transformation on the peptide sequences is shown as red connectors and green colored letters, respectively.

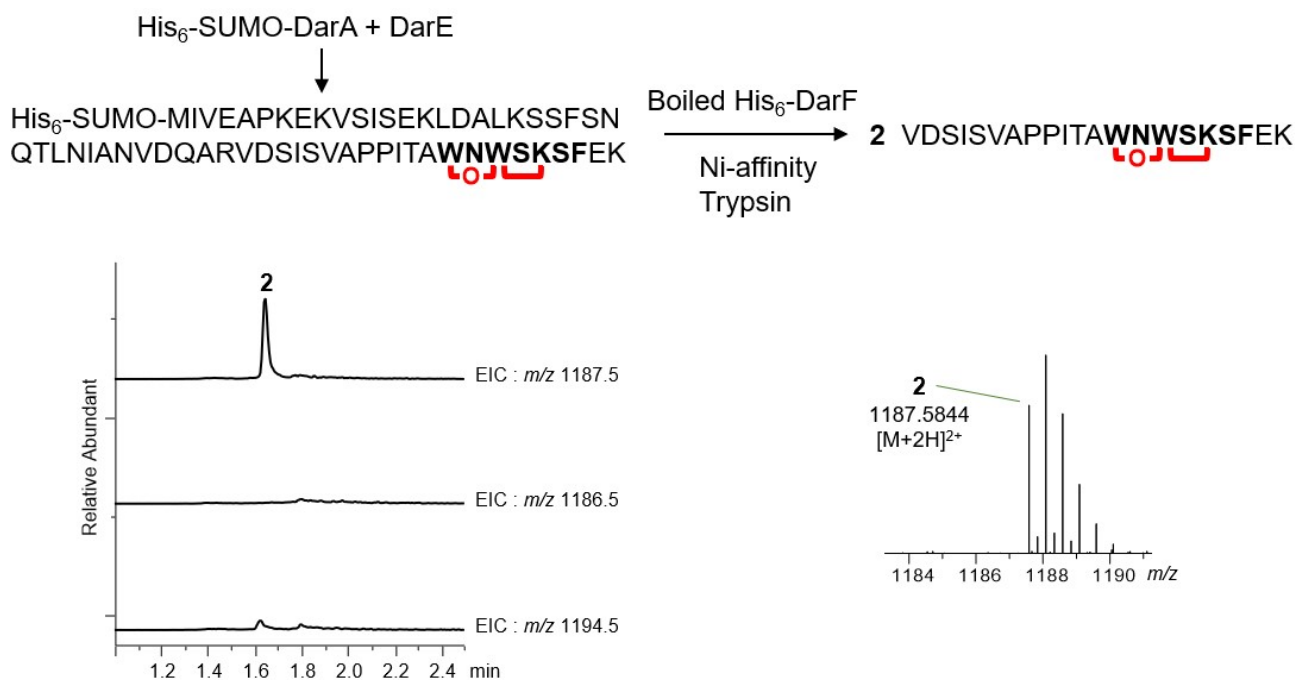

**Figure S6.** *In vitro* assay of boiled His<sub>6</sub>-DarF + modified full-length His<sub>6</sub>-SUMO-DarA. The EIC chromatogram and MS spectrum of fragment **2**. Core peptides are shown as bold letters. Cross-link on the peptide sequences is shown as red connectors.

| Ion | Fragment                  | Calc.      | Obs.      | error (ppm) |
|-----|---------------------------|------------|-----------|-------------|
| b2  | VD                        | 215.10318  | 215.1034  | 1.0228      |
| b3  | VDS                       | 302.13521  | 302.1339  | -4.3358     |
| b4  | VDSI                      | 415.21927  | 415.2143  | -11.9696    |
| b5  | VDSIS                     | 502.2513   | 502.25    | -2.5883     |
| b6  | VDSISV                    | 601.31972  | 601.3207  | 1.6297      |
| b7  | VDSISVA                   | 672.35683  | 672.3567  | -0.1933     |
| b8  | VDSISVAP                  | 769.40959  | 769.4053  | -5.5757     |
| b10 | VDSISVAPPI                | 979.54642  | 979.4728  | -75.1572    |
| b11 | VDSISVAPPIT               | 1080.5941  | 1080.5873 | -6.2928     |
| b12 | VDSISVAPPITA              | 1151.63121 | 1151.6309 | -0.2692     |
| y1  | K                         | 147.11335  | 147.1133  | -0.3399     |
| y2  | EK                        | 276.15595  | 276.1526  | -12.1308    |
| y3  | FEK                       | 423.22436  | 423.2207  | -8.6479     |
| y4  | SFEK                      | 510.25639  | 510.2531  | -6.4477     |
| y9  | WNWSDhKSFEK [+10 Da]      | 1221.5329  | 1221.5342 | 1.0642      |
| y10 | AWNWSDhKSFEK [+10 Da]     | 1292.57001 | 1292.5802 | 7.8835      |
| y11 | TAWNWSDhKSFEK [+10 Da]    | 1393.61769 | 1393.6113 | -4.5852     |
| y13 | PITAWNWSDhKSFEK [+10 Da]  | 1603.75452 | 1603.8048 | 31.3514     |
| y14 | PPITAWNWSDhKSFEK [+10 Da] | 1700.80728 | 1700.799  | -4.8683     |

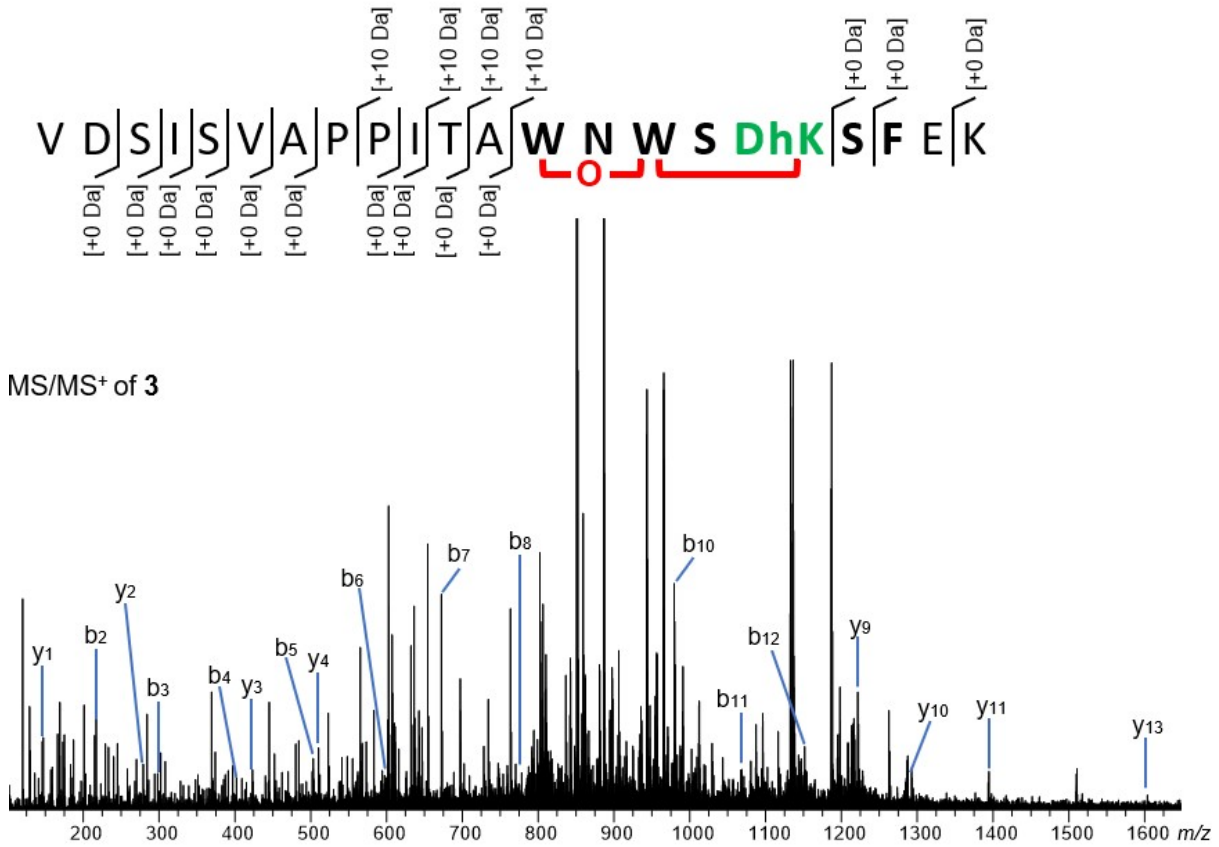

Figure S7. The MS/MS spectrum of fragment 3.

| Ion | Fragment                   | Calc.      | Obs.      | error (ppm) |
|-----|----------------------------|------------|-----------|-------------|
| b2  | VD                         | 215.10318  | 215.1021  | -5.0208     |
| b3  | VDS                        | 302.13521  | 302.1343  | -3.0119     |
| b4  | VDSI                       | 415.21927  | 415.2205  | 2.9623      |
| b6  | VDSISV                     | 601.31972  | 601.313   | -11.1754    |
| b7  | VDSISVA                    | 672.35683  | 672.3544  | -3.6142     |
| b12 | VDSISVAPPITA               | 1151.63121 | 1151.629  | -1.9190     |
| y1  | K                          | 147.11335  | 147.1123  | -7.1374     |
| y3  | FEK                        | 423.22436  | 423.2231  | -2.9771     |
| y4  | SFEK                       | 510.25639  | 510.2597  | 6.4869      |
| y9  | WNWSEpKSF EK [+26 Da]      | 1237.52781 | 1237.5317 | 3.1434      |
| y10 | AWNWSEpKSF EK [+26 Da]     | 1308.56493 | 1308.5665 | 1.1998      |
| y11 | TAWNWSEpKSF EK [+26 Da]    | 1409.6126  | 1409.6077 | -3.4761     |
| y13 | PITAWNWSEpKSF EK [+26 Da]  | 1619.74943 | 1619.7322 | -10.6374    |
| y14 | PPITAWNWSEpKSF EK [+26 Da] | 1716.8022  | 1716.7845 | -10.3099    |

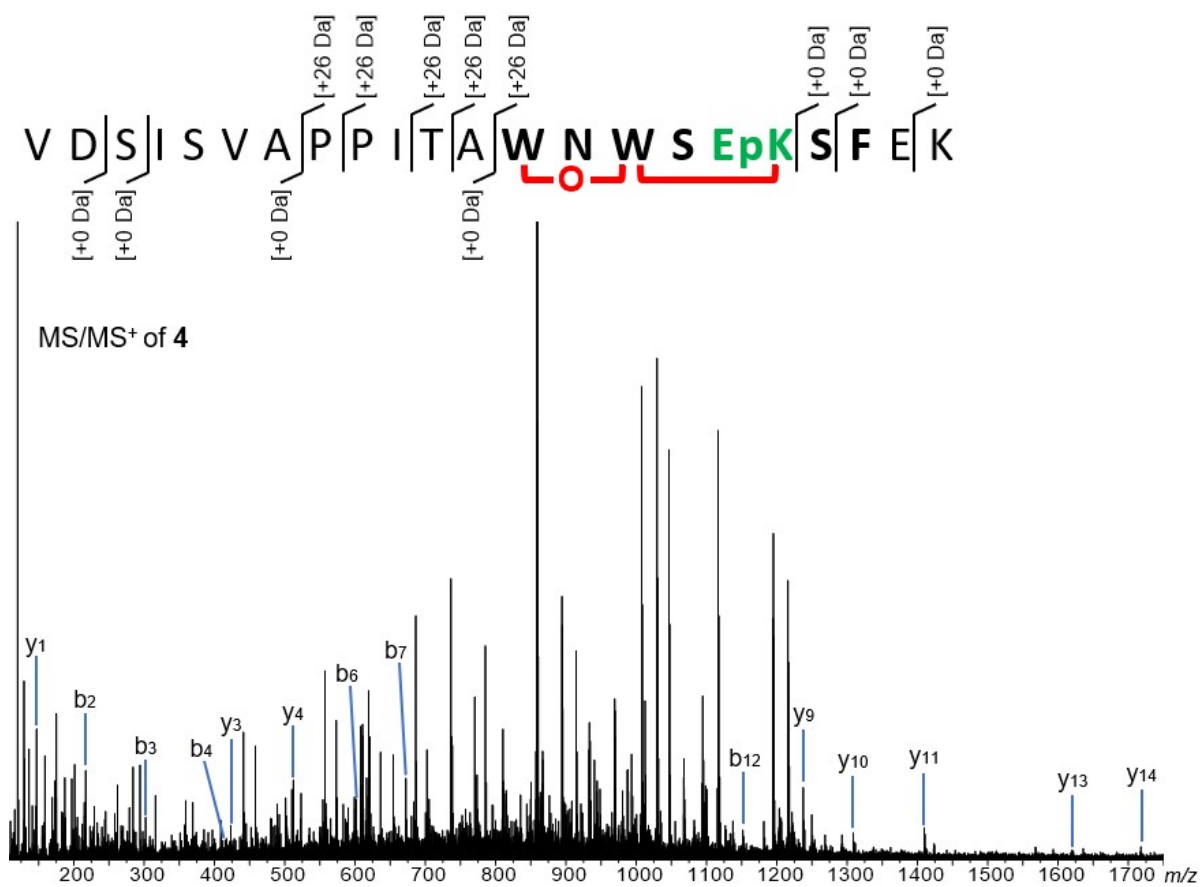

**Figure S8.** The MS/MS spectrum of fragment 4.

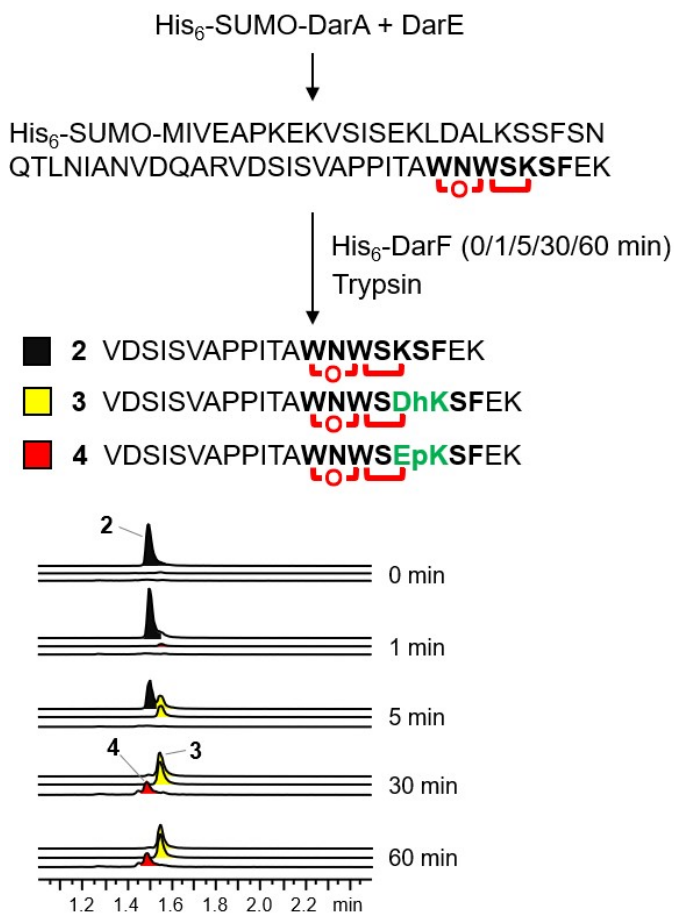

**Figure S9.** Time-course *in vitro* assay of His<sub>6</sub>-DarF. Core peptides are shown as bold letters. Cross-link and DarF transformation on the peptide sequences is shown as red connectors and green colored letters, respectively. EIC of peptide fragments **2** ( $m/z$  1187.5), **3** ( $m/z$  1186.5) and **4** ( $m/z$  1194.5) are indicated in first, second and third lines in the chromatogram. EIC of peaks **2**, **3** and **4** are colored as black, yellow and red.

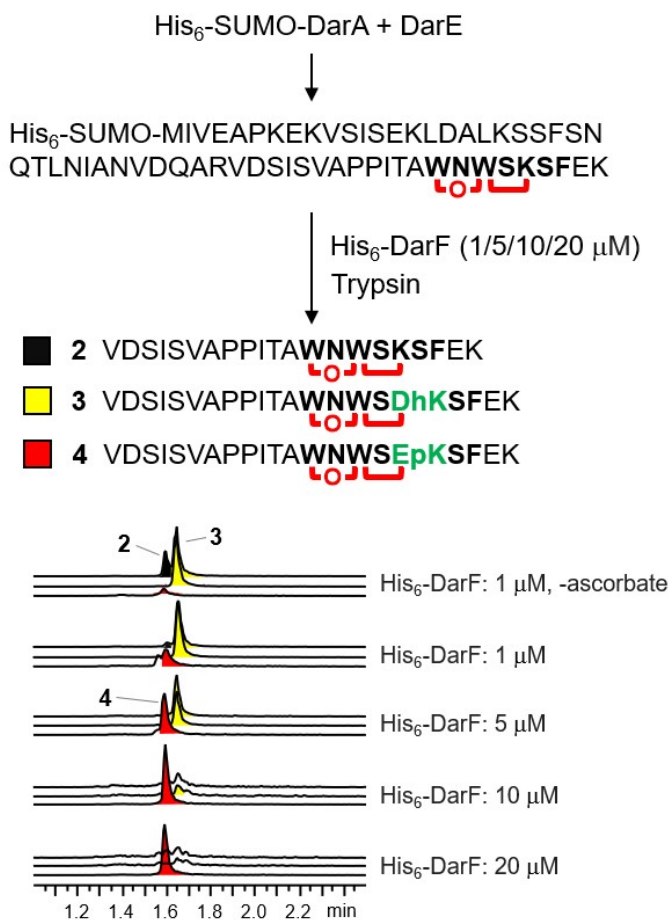

**Figure S10.** Enzyme concentration-dependent *in vitro* assay of His<sub>6</sub>-DarF. Experiment without addition of ascorbate resulted an incomplete conversion of **2** to **3/4**. Core peptides are shown as bold letters. Cross-link and DarF transformation on the peptide sequences is shown as red connectors and green colored letters, respectively. EIC of peptide fragments **2** (*m/z* 1187.5), **3** (*m/z* 1186.5) and **4** (*m/z* 1194.5) are indicated in first, second and third lines in the chromatogram. EIC of peaks **2**, **3** and **4** are colored as black, yellow and red.

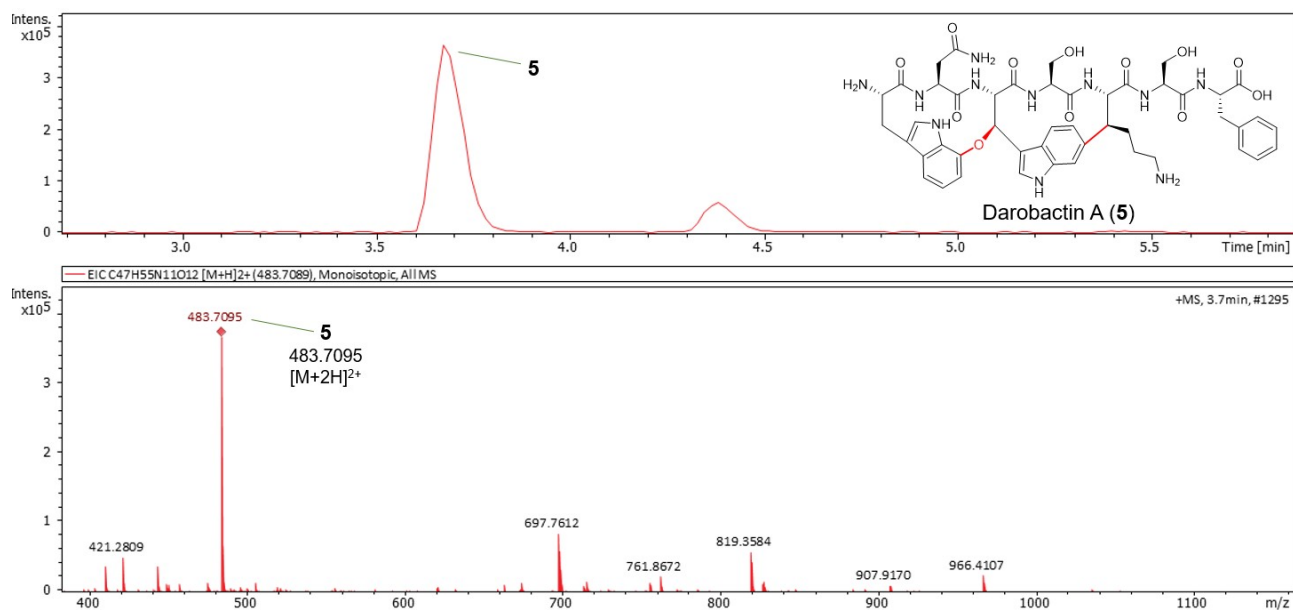

**Figure S11.** The EIC chromatogram and MS spectrum of darobactin A (**5**) from chemical extraction of *Pseudoalteromonas luteoviolacea* H33. HR-MS  $m/z$   $[M+2H]^2$  calculated for  $C_{47}H_{55}N_{11}O_{12}$  483.7089; observed 483.7085; error in ppm -0.83.

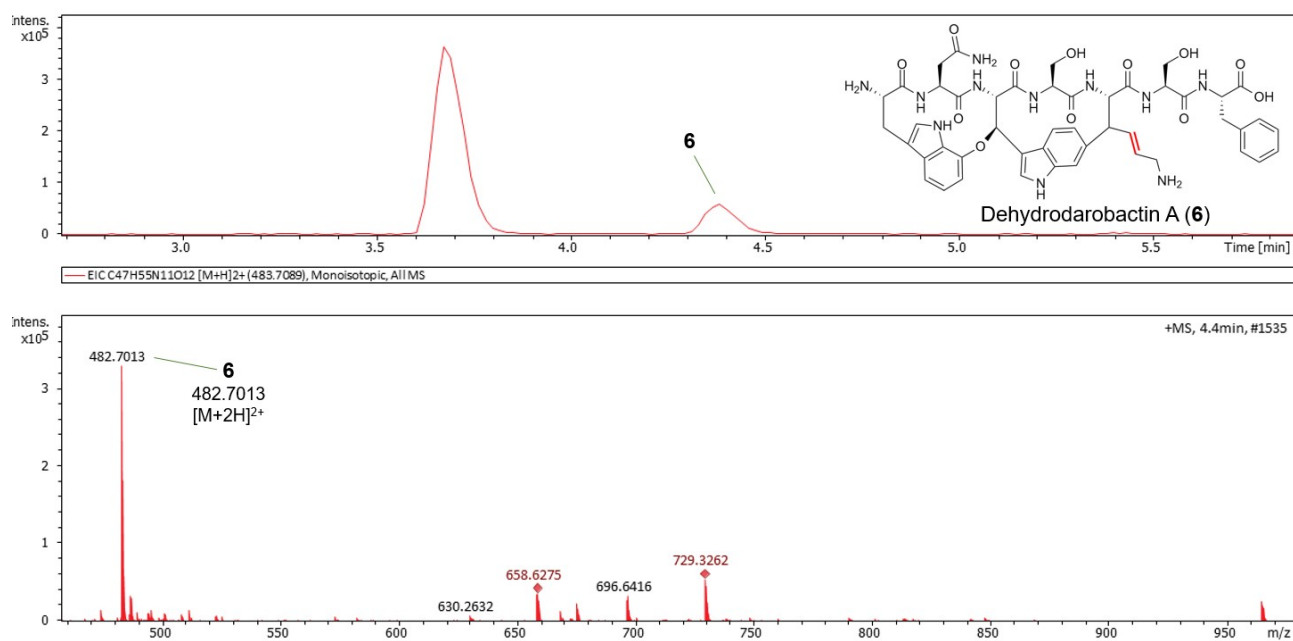

**Figure S12.** The EIC chromatogram and MS spectrum of dehydrodarobactin A (**6**) from chemical extraction of *Pseudoalteromonas luteoviolacea* H33. HR-MS  $m/z$   $[M+2H]^2$  calculated for  $C_{47}H_{53}N_{11}O_{12}$  483.7010; observed 482.7013; error in ppm 0.62.

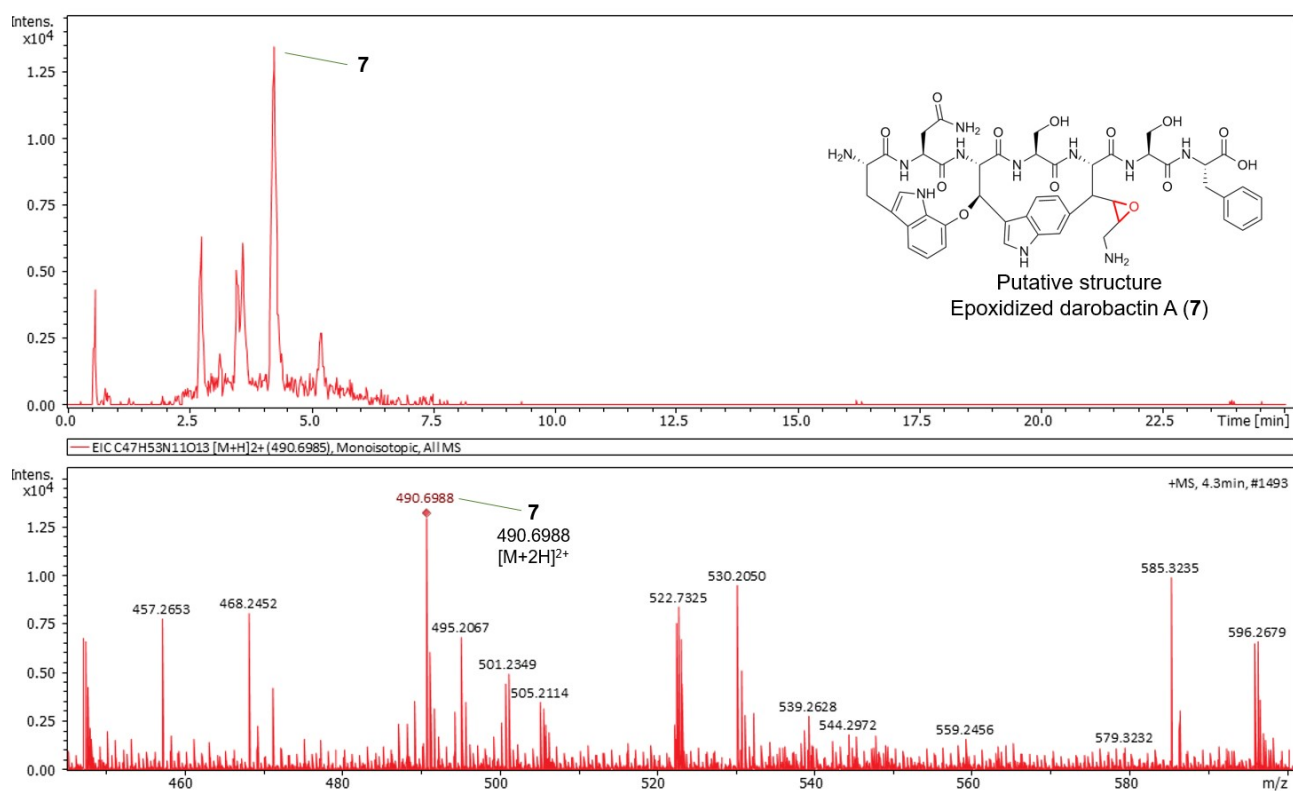

**Figure S13.** The EIC chromatogram and MS spectrum of epoxidized darobactin A (**7**) from chemical extraction of *Pseudoalteromonas luteoviolacea* H33. HR-MS  $m/z$  [M+2H]<sup>2+</sup> calculated for C<sub>47</sub>H<sub>53</sub>N<sub>11</sub>O<sub>13</sub> 490.6985; observed 490.6988; error in ppm 0.61.

| No: | Chain  | Z    | rmsd | lali | nres | %id | PDB | Description                                                 |
|-----|--------|------|------|------|------|-----|-----|-------------------------------------------------------------|
| 1:  | 8s5f-A | 23.3 | 3.5  | 292  | 342  | 13  |     | MOLECULE: CHLH FROM CHLOROGLOEOPSIS SP.;                    |
| 2:  | 5xbn-A | 7.3  | 3.3  | 111  | 128  | 12  |     | MOLECULE: WSS1P;                                            |
| 3:  | 4l7a-A | 6.3  | 4.9  | 151  | 261  | 10  |     | MOLECULE: UNCHARACTERIZED PROTEIN;                          |
| 4:  | 5n0c-A | 6.2  | 3.7  | 150  | 1293 | 13  |     | MOLECULE: TETANUS TOXIN;                                    |
| 5:  | 9b6m-A | 6.1  | 4.4  | 147  | 390  | 11  |     | MOLECULE: PG1 LIGHT CHAIN;                                  |
| 6:  | 3e11-A | 5.8  | 2.4  | 82   | 114  | 15  |     | MOLECULE: PREDICTED ZINCIN-LIKE METALLOPROTEASE;            |
| 7:  | 8qft-A | 5.8  | 3.8  | 153  | 1174 | 8   |     | MOLECULE: NON-TOXIC NON-HEMAGGLUTININ PROTEIN X;            |
| 8:  | 1z1w-A | 5.7  | 5.5  | 132  | 780  | 4   |     | MOLECULE: TRICORN PROTEASE INTERACTING FACTOR F3;           |
| 9:  | 6mzc-B | 5.5  | 4.2  | 159  | 968  | 6   |     | MOLECULE: TRANSCRIPTION INITIATION FACTOR TFIID SUBUNIT 2;  |
| 10: | 7v9o-A | 5.4  | 4.2  | 155  | 860  | 12  |     | MOLECULE: ALANINE AMINOPEPTIDASE;                           |
| 11: | 8d2j-B | 5.3  | 3.9  | 115  | 483  | 8   |     | MOLECULE: IPD113_COW;                                       |
| 12: | 4fgm-A | 5.3  | 4.1  | 156  | 587  | 10  |     | MOLECULE: AMINOPEPTIDASE N FAMILY PROTEIN;                  |
| 13: | 7y7o-A | 5.3  | 3.3  | 107  | 147  | 9   |     | MOLECULE: ENDORIBONUCLEASE YBEY;                            |
| 14: | 7pfs-A | 5.2  | 4.2  | 156  | 916  | 10  |     | MOLECULE: ENDOPLASMIC RETICULUM AMINOPEPTIDASE 2;           |
| 15: | 2h1n-A | 5.2  | 4.5  | 148  | 566  | 10  |     | MOLECULE: OLIGOENDOPEPTIDASE F;                             |
| 16: | 6ggo-A | 5.2  | 4.0  | 131  | 199  | 9   |     | MOLECULE: BACTERIOPHAGE VIRULENCE DETERMINANT;              |
| 17: | 1vct-A | 5.2  | 2.6  | 71   | 193  | 6   |     | MOLECULE: HYPOTHETICAL PROTEIN PH0236;                      |
| 18: | 7c79-L | 5.2  | 3.1  | 85   | 131  | 6   |     | MOLECULE: RIBONUCLEASE MRP RNA SUBUNIT NME1;                |
| 19: | 1sum-B | 5.1  | 3.0  | 71   | 224  | 8   |     | MOLECULE: PHOSPHATE TRANSPORT SYSTEM PROTEIN PHOU HOMOLOG 2 |
| 20: | 8c8g-A | 5.0  | 4.6  | 158  | 1335 | 16  |     | MOLECULE: PUTATIVE BOTULINUM-LIKE TOXIN WO;                 |

**Figure S14.** Top 20 DALI<sup>12</sup> hits of DarF structure predicted by AlphaFold3.<sup>13</sup> The output results indicate that the HExxH enzyme ChIH (PDB: 8S5F)<sup>8</sup> is structurally most similar to DarF, as shown in red bracket.

```

DarF  MNTLTNELPKCLEFNNDNFADIFSQCKIDLLVDIFKREILSHKELSELFDKLSNTFSEELYHFFKLPKLMKYIFTSRGK
MscH  DGMEAL TALDRSAPESVARIAAHPYVRAMAYDCL--AGSGTGARQGPDYLSALAYAAALDAGTPVRLDYPYRSG
SjiH  EAMEVATLDEARPEALDQALAHPTFRSMALDCL--REANRPAERFGGVAELAAASAALFAGRREKLTLPYRDG
ChlH  IEKQQLNRQTKGIAFIDIAAFESPLTSSASIQQ--LE-HWAADARKEFEKALMAYLEKEPGKRDIINQFQTCP

```

```

DarF  DNYIDNIKALFLNELKYAELDNHAISNSALIEQPQLIWNLRSDIAYNPLTQKAYKNWYQHKETGIIIDYFSDLARGEQRD
MscH  RLHLPTVGTVLLPEVGDGAARVETGPGSLRYAGDVTVAIR-PGTPGDAPRWHPTRVLA----APDVSVLLEDGDPHRDC
SjiH  G-ELRLPGHGVLSEVGGASVYVYTERGRFTVETPDEHIEVL-LGRGYS DARWHPYHRRSGGQASAWELQLDDTDPQRRR
ChlH  PEILNKL--VLRPSVYLWTTVMLQASNGITIHSDIGELIAP-DI NYLEELAESL KSPNEGYPYINRDDLMRLPFGQRIL

```

```

DarF  IPMGDTG-ISQCLIDNTAPKYVTSRIDYIQSVSPACFNVLKASTYSTVYRFDTTKNIFNCASTNICNGLVVLINPHLNEYS
MscH  HRLPAGDRLDDAGAAARWAETFAAAWQYIRDEVPG----HAEELR-AGLRAYVPLRRSGAGVSEASTARQAFGGVAATE
SjiH  HHWDPADPMAEAEADAWQTELAEMQLIDETLPG----YAPGLR-AGLRTIYPLRPATDGTYYSGAARDVFGTYGIRPG
ChlH  FESDEVGNIGTTIYHESLKLIESWRPALLSEIIT----ISPETIQFIKDPTAHPDKVVSFSDNSYPGALYVSI RQGSRYID

```

HExxH motif

PWRxxxRP motif

```

DarF  VETL-ADAIVHEHTHNLFDIAELYEPCLP TKFHPQTIKSPHTGRLDPNTYIQACYTHYGLRNFHQKAYKHFNTE---NA
MscH  AGSL-AVLLVHEFQHSKMALLDIDC-LVDGTRPIDITVGRPDPPEAEVYLVGIYAAHAYADIRIRADRQVDG---A
SjiH  SAELMALLIHEFQHYKLGAYFDLED-LFDRSDARLFHAPWRKDLRPFEGLFQGTYAHIAVYEFWRSRSRATGEQ---QA
ChlH  QYDL-ADSLIHEHRHQKLYLLQRSIP-LIE-IDAPLVSPWRDLRPPSGLLHAIYVFTHLLEFWAYLSREGQQQIKYRA

```

```

DarF  HKYLQQASKGFEQAEFYRIAKNSDEIINTKLITTLERLK
MscH  QAYYRRYRDWTAERIGALQRADALTPAGSRLVRQVARSMSGWPS
SjiH  RYEFYRWLDHTYRAIVEMAGSGTLTPRGERFVAAMRATVEPHLAETTEAERAEGGTRG
ChlH  KNQVETIRTRLLVAIPTLKRTH-LTTAGREHVEQLEELTTMGAIKY

```

**Figure S15.** A sequence alignment generated using Multalin version 5.4.1.<sup>14</sup> Conserved HExxH and PWRxxxRP motifs are shown in green brackets. Aligned  $\alpha$ KG-dependent HExxH enzymes, MscH<sub>429-768</sub> (WP\_013477425.1),<sup>8</sup> SjiH<sub>460-819</sub> (WP\_042453644.1),<sup>8</sup> ChlH<sub>376-722</sub> (WP\_016869186.1),<sup>8</sup> and DarF (WP\_063364329.1).<sup>2</sup> The C-terminal HExxH domains in MscBH, SjiBH and ChlBH are referred to as MscH, SjiH and ChlH, respectively.

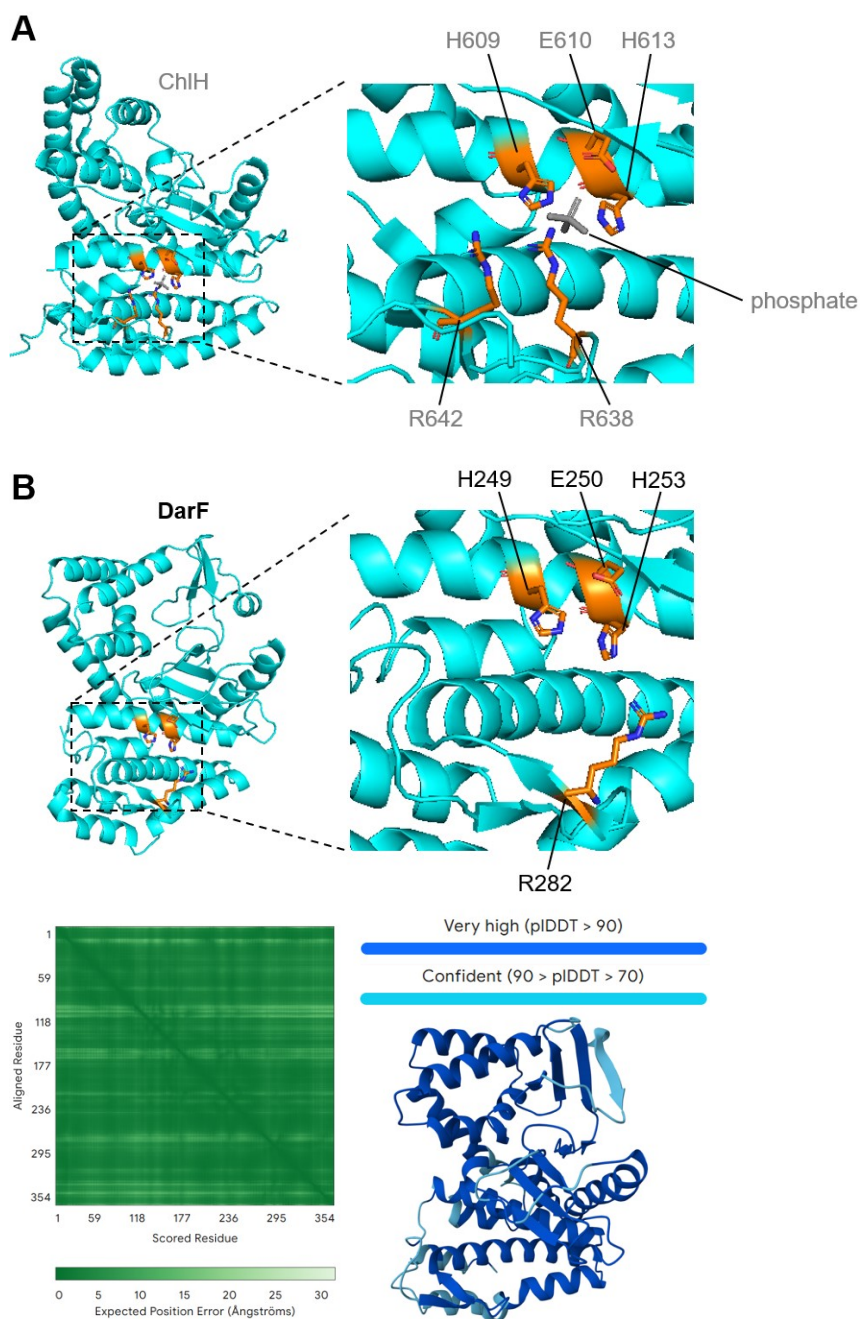

**Figure S16.** Overview of HExxH and PWRxxxRP motifs in  $\alpha$ KG-dependent HExxH enzymes. (A) The crystal structure of N-terminal His<sub>6</sub> tag ChlH (PDB: 8S5F).<sup>8</sup> (B) The predicted structure of DarF by AlphaFold3,<sup>13</sup> and confidence measure of PAE for modeling.

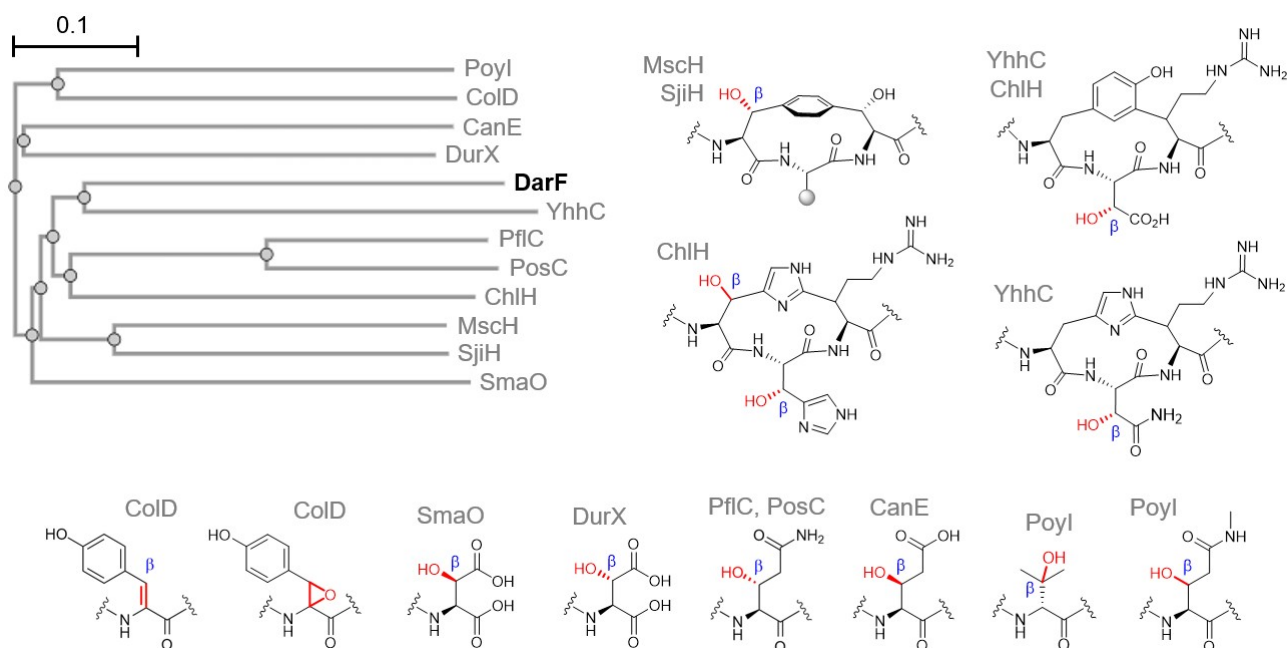

**Figure S17.** The reactions of RiPP  $\alpha$ KG-dependent enzymes and their phylogenetic tree generated from Clustal Omega multisequence alignment of Poyl (AFS60645.1),<sup>3</sup> DurX (WP\_071962208.1),<sup>4</sup> CanE (KUN61407.1),<sup>5</sup> YhhC (WP\_003708570.1),<sup>6</sup> SmaO (WP\_141401631.1),<sup>7</sup> MscH<sub>429-768</sub> (WP\_013477425.1),<sup>8</sup> SjiH<sub>460-819</sub> (WP\_042453644.1),<sup>8</sup> ChlH<sub>376-722</sub> (WP\_016869186.1),<sup>8</sup> PflC (WP\_192559974.1),<sup>9</sup> PosC (WP\_060837885.1),<sup>9</sup> ColD (WP\_033308454.1),<sup>10</sup> and DarF (WP\_063364329.1).<sup>2</sup> Known enzymes and DarF (this study) are shown as grey and bold black colored letters, respectively. The enzymatic reactions in the structures are shown as red colored bonds.

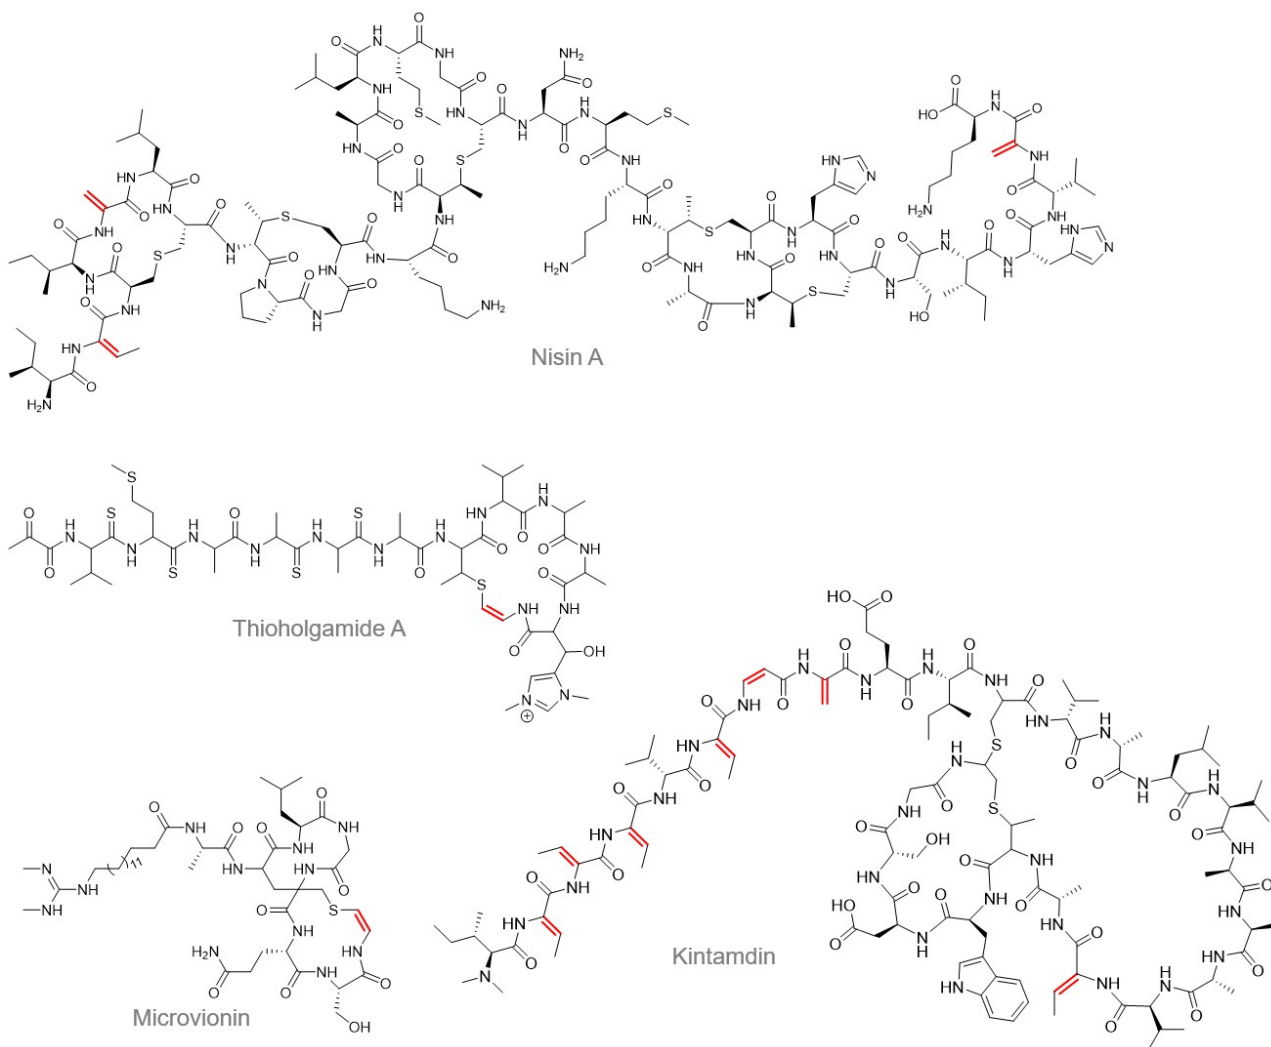

**Figure S18.** Representative examples of lanthipeptides containing dehydroamino acids such as nisin A,<sup>15</sup> thiolgamide A,<sup>16</sup> microvionin<sup>17</sup> and kintamdin.<sup>18</sup> Desaturated formation on the structure is shown as red bonds.

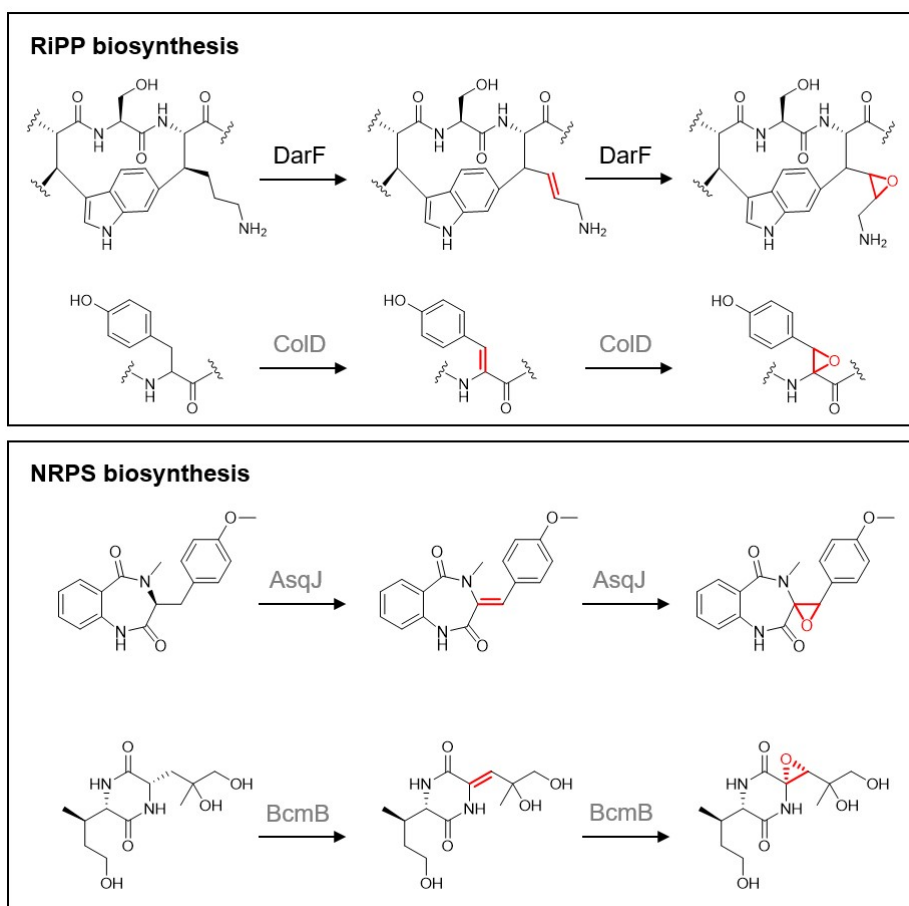

**Figure S19.** Overview of  $\alpha$ KG-dependent enzymes catalyzed dehydrogenation and epoxidation in RiPP and non-ribosomal peptide synthetase (NRPS) biosynthesis. DarF from the darobactin biosynthesis in bacterial RiPP. CoID from the collinodin biosynthesis in bacterial RiPP.<sup>10</sup> AsqJ from the viridicatin biosynthesis in fungal NRPS.<sup>19</sup> BcmB from the bicyclomycin biosynthesis in bacterial NRPS.<sup>20</sup> Desaturated and epoxide formation on the structure is shown as red bonds. Known enzymes and DarF (this study) are shown as grey and bold black colored letters, respectively.

**Table S1.** Gene sequences used in this study.

| Gene                       | Vector (Restriction Sites) | Insert Sequence <sup>b</sup>                                                                                                                                                                                                                                                                                                                                                                                                                                                                                                                                                                                                                                                                                                                                                                                                                                                                                                                                                                                                                                                                                                                                                                                                                                                                                                                                                                                                                                           |
|----------------------------|----------------------------|------------------------------------------------------------------------------------------------------------------------------------------------------------------------------------------------------------------------------------------------------------------------------------------------------------------------------------------------------------------------------------------------------------------------------------------------------------------------------------------------------------------------------------------------------------------------------------------------------------------------------------------------------------------------------------------------------------------------------------------------------------------------------------------------------------------------------------------------------------------------------------------------------------------------------------------------------------------------------------------------------------------------------------------------------------------------------------------------------------------------------------------------------------------------------------------------------------------------------------------------------------------------------------------------------------------------------------------------------------------------------------------------------------------------------------------------------------------------|
| DarA<br>WP_15573178<br>5.1 | pET28a(+)<br>NcoI(-G)/XhoI | ggcagcagccatcatcaccaccatcacgggtccctgcaggactcagaagtcaa<br>tcaagaagctaagccagaggtcaagccagaagtcaagcctgagactcacatc<br>aattaaagggtgccgatggatcttcagagatcttctcaagatcaaaaagaccact<br>ccttaagaaggctgatggaagcgttcgctaaaagacagggttaaggaaatgga<br>ctcctaacgttctgtacgacggtattgaaattcaagctgatcagaccctgaaga<br>ttggacatggaggataacgatattattgaggctcaccgccaacagattggaggt<br>ATTGTTGAAGCGCCAAAAGAAAAGGTCTCCATCTCCGA<br>AAAGTTGGACGCACTGAAGTCGTCTCTCTAACCAA<br>CCTAAATATTGCAATGTGGACCAAGCGCGCTTGAC<br>TCCATATCCGTGGCTCCACCCATTACAGCATGGAAGT<br>GTCCAAATCTTTCGAGAAATAAGAATTCCGAGTTCTGGT<br>TCGTCCGAGCGGAGCCGCAGATTGAGACCAACTGGTG<br>ACAAGACTTCTCCTGAATACATTCTTCTGCCTAGTAGC<br>GGGTGATAATGGTTACTTCCCGCCGGAGTAGAA                                                                                                                                                                                                                                                                                                                                                                                                                                                                                                                                                                                                                                                                                                                                                                              |
| DarE<br>WP_06336433<br>3.1 | pCDFDuet-1<br>NdeI_XhoI    | CTGGGCGATATTAGCGTCAAAGTGATTGAGGAGCCGG<br>TTAATCCTGTAAACCAACTCGAATTGACTGACTACCAGT<br>ACTCTCGTCTGGCTTCGCAACTTATAGGCGAGATCCCA<br>GACAGTGACATGTTGGACGAAGAGGAGCTCGCCCTCT<br>TTCGACGGGAGAAGGACGCCTACTTCGAGGCCAAACC<br>CCTGAACGCGAGCAAGGTCGTGGTTGTGTTGAAAGCTA<br>CGAGACTGTGCAACTTACGCTGTACATACTGCCACTCT<br>TGGGCCGAGGGCCCAAACCAAACACTGTAAAATTCGAGAA<br>CCTGATTTCCATTGTCAAGCGTATTCTGGCCATCCCGA<br>ATGTAAGTCGGGTTGAATTCGTTTGGCACGGCGGTGAA<br>GTGACATTATTACGCCCTGCCTTCTTCAAGAACTTATC<br>TGGCTGCAAGAGCAATTCAAGCGTAAGGATCACTTCAT<br>CACCAATACGATGCAATCCAATGCGGTGAACATCTCCA<br>AGGAGTGGCTTACATTTCTGCAGGGTATTGGTATGGCC<br>GTCGGCATTTCGTTTCGATGGCGTTCCAGAAATCAACGA<br>TACACGTCGCCTTGACGTTAGAGGGCGACCGACATCCT<br>TAAAGGTAGCAGAGGGCATCAAACGTCTGCAAGAATAC<br>GGTATACCCTATGGCGCTTTAATCGTCGTAGATCGGGA<br>CGTCTACAATGTATCACCGGAGAGACTGTTGAGTTATC<br>TCGCTAGCATCGAACTCAATGACATCGAGTTCTTAAACA<br>TCGTACCAGATAACCGCGCGCAACCCGGCGATGACAT<br>CGGAGATGCCTACATTAGTTACAAAGAATATATAGAGTT<br>CCTCAGCCGTGTTTATACTGTGTGGCATGCCAGTACC<br>GCGGGATAATACAAATACGCATGTTTGAGAACTTCATG<br>GACGTTCTGGCGGATCGGAGTAAGCAATTGTCCGCTTG<br>CTATTGGGCTGGCAATTGTAGTCAAGAAATTATAACCAT<br>TGAGCCGAACGGCGATGTGAGCCCATGTGACAAGTAT<br>GTAGGTGATATAGGATCAATCTATGGATCTTTGCTTGAT<br>TCGGATCTGGCTACCCTGCTGGCTGACTCGAAGCATAA<br>CCAAACATCTGTCTTAGAGGAAGTCGAGAGTCACTCTC<br>GCATGCACGAGTGTAAGTGGTTCTCTATTTGCAACGGT<br>GGATGTCTCACGACCGGGTATCAACGCTCGCCACG<br>TTGAGGATTATGACGACAAGTGTGCGGTACTGGAAAG<br>CTTTTGAAAGTCATTGAAGAGAGTATTTGA |
| DarF                       | pET28a(+)                  | AACACGTTAACGAACGAGCTCCCGAAGTGTTTAGAGTT                                                                                                                                                                                                                                                                                                                                                                                                                                                                                                                                                                                                                                                                                                                                                                                                                                                                                                                                                                                                                                                                                                                                                                                                                                                                                                                                                                                                                                 |

|                    |           |                                                                                                                                                                                                                                                                                                                                                                                                                                                                                                                                                                                                                                                                                                                                                                                                                                                                                                                                                                                                                                                                                                                                                                            |
|--------------------|-----------|----------------------------------------------------------------------------------------------------------------------------------------------------------------------------------------------------------------------------------------------------------------------------------------------------------------------------------------------------------------------------------------------------------------------------------------------------------------------------------------------------------------------------------------------------------------------------------------------------------------------------------------------------------------------------------------------------------------------------------------------------------------------------------------------------------------------------------------------------------------------------------------------------------------------------------------------------------------------------------------------------------------------------------------------------------------------------------------------------------------------------------------------------------------------------|
| WP_06336432<br>9.1 | NdeI_XhoI | CAACTCAGACAACCTTTGCGGATATCTTTTCTCAATGTAA<br>GATTGACCTGCTCGTGGACATCTTCAAACGCGAGATCC<br>TGTACACAAGGAGTTGTCAGAGTTGTTTCGATAAGTTG<br>TCAAACACATTCTCATCAGAAGAGCTGTATCATTTCTTT<br>AAGTTGCCGAAGTTGTGGAAGGTTATATTTACCAGCCG<br>CGGAAAAGATAATTATATCGATAACATTAAGGCTCTTTT<br>CTTGAACGAGCTGAAGGTAGCGGAACTCGATAACCAC<br>GCCATTTCCAACCTCCGCGTTGATAGAGCAACCTCAGCT<br>GATATGGAATCTCCGTTTCCAGACATCGCGTATAACCCAC<br>TGACGCAAAGGCTTACAAGAACAATTACCAACACAAG<br>GAGACGGGTATTATCATCGACTACTTTTCTGACCTTGCA<br>CGCGGTGAACAGCGGGATATCCCGTGGGGTGACACAG<br>GAATTTCCCAATGCCTGATCGACAACACGGCCCCGAAG<br>GTAACCTCTGCAATTGATTACATACAAAGTGTATCACCG<br>GCATGTTTCAATGTACTTAAAGCGAGTATTTACAGCATC<br>GTGGTCCGCTTCGATAACAACGAAGAACATCTTCAACTG<br>CGCATCTACGAACATATGCAATGGTTTAGTGGTATTAAT<br>TAATCCTCACTTAAACGAGGTGTCTGTGCGAAACACTTG<br>CCGATGCGATCGTCCATGAGATGACACACAACCTTTTC<br>GATATAGCAGAACTCTACGAACCATGCCTGCCAACGAA<br>GTTCCATCCACAAACAATCAAGTCTCCGTGGACTGGAC<br>GCATGCTGGACCCTAACACTTACATTCAGGCCTGTTAT<br>ACATGGTATGGGCTCCGCAACTTCTGGCAAAGGCATA<br>CAAGCACTTCAATACTGAGAACGCGCATAAGTACTTGC<br>AGCAGGCGTCTAAGGGCTTCGAGCAGGCAGAGTTCGT<br>AAGAATCGCTAAGAATAGTGATGAAATTATTAATACCAA<br>GTTGATTACAACCTTGGAGAGATTAATGA |
|--------------------|-----------|----------------------------------------------------------------------------------------------------------------------------------------------------------------------------------------------------------------------------------------------------------------------------------------------------------------------------------------------------------------------------------------------------------------------------------------------------------------------------------------------------------------------------------------------------------------------------------------------------------------------------------------------------------------------------------------------------------------------------------------------------------------------------------------------------------------------------------------------------------------------------------------------------------------------------------------------------------------------------------------------------------------------------------------------------------------------------------------------------------------------------------------------------------------------------|

<sup>a</sup>Codons were optimized for heterologous expression in *E. coli*. <sup>b</sup>His<sub>6</sub>-SUMO tag sequence was described in blue colored letters.

**Table S2.** Amino acid sequence of protein/peptide used in this study.

| Protein | sequence                                                                                                                                                                                                                                                                                                                                                                                                                                                                      |
|---------|-------------------------------------------------------------------------------------------------------------------------------------------------------------------------------------------------------------------------------------------------------------------------------------------------------------------------------------------------------------------------------------------------------------------------------------------------------------------------------|
| DarE    | MLGDISVKVIEEPVNPVNQLELTDYQYSRLASQLIGEIPDSDMLDEEELALFRR<br>EKDAYFEAKPLNASKVVVVLKATRLCNLRCTYCHSWAEGPNQTVKFENLISIVK<br>RILAI PNVS RVEFVWHGGEVTL LRPAFFK KLIWLQE QFKRKHDFITNTMQSNAV<br>NISKEWLTFLQGIGMAVGISFDGVP EINDTRRLDVRGRPTSLKVAEGIKRLQEY<br>GIPYGALIVVDRDVYNVSPERLLSYLASELNDIEFLNIVPDNRAQPGDDIGDAYI<br>SYKEYIEFLSRVYTVWHAQYRGIIQIRMFENFMDVLADRSKQLSACYWAGNCS<br>QEITIEPNGDVSPCDKYVGDIGSIYGSLLDSDLATLLADSKHNQTSVLEEVESH<br>SRMHECKWFSICNGGGCPHDRVINARHVEDYDDKCCGTGKLLKVIEESI |
| DarF    | MNLTNENLPKCLEFNSDNFADIFSQCKIDLLVDIFKREILSHKELSELDKLSNTF<br>SSEELYHFFKLPKLWVKVIFTSRGKDNIDNIKALFLNELKVAELDNHAI NSALIE<br>QPQLIWNLRSDIAYNPLTQKAYKNNYQHKETGIIIDYFSDLARGEQRDIPWGDT<br>GISQCLIDNTAPKV TSAIDYIQSVSPACFNVLKASIYSIVRFDTTKNIFNCAS T NI<br>CNGLVVLINPHLNEVSVETLADAI VHEMTHNLF DIAELYE PCLPTKFHPQTIKSP<br>WTGRMLDPNTYIQACYTWYGLRNFVWQKAYKHFNTENAHKYLQQASKGFEQA<br>EFVRIAKNSDEIINTKLITTLERLK                                                                               |
| DarA    | MIVEAPKEKVSISEKLDALKSSFSNQTLNIANVDQARVDSISVAPPITAWNWSKS<br>FEK                                                                                                                                                                                                                                                                                                                                                                                                                |

**Table S3.** Strains used in this study.

| Strains                                                 | Description                                                                                                               |
|---------------------------------------------------------|---------------------------------------------------------------------------------------------------------------------------|
| <i>E. coli</i> DarA                                     | <i>E. coli</i> NiCo (DE3) harboring DarA-pET28a(+)                                                                        |
| <i>E. coli</i> DarA + DarE                              | <i>E. coli</i> NiCo (DE3) harboring DarA-pET28a(+) and DarE-pCDFDuet-1                                                    |
| <i>E. coli</i> DarF                                     | <i>E. coli</i> NiCo (DE3) harboring DarF-pET28a(+)                                                                        |
| <i>Pseudoalteromonas luteoviolacea</i> H33 <sup>a</sup> | Wild-type strain. This strain was previously provided by Lone Gram <sup>21</sup> to Nils Böhringer and Till F. Schäberle. |

<sup>a</sup>Wild-type strain, native producer of darobactin A, bromodarobactin A, dehydrobromodarobactin A, and dehydrodarobactin A, where their structures have been verified by NMR and HR-MS.<sup>2</sup>

## References

1. Altschul, S. F.; Gish, W.; Miller, W.; Myers, E. W.; Lipman, D. J. Basic local alignment search tool. *J. Mol. Biol.* **1990**, *215*, 403–410.
2. Böhringer, N.; Kramer, J. C.; de la Mora, E.; Padva, L.; Wuisan, Z. G.; Liu, Y.; Kurz, M.; Marner, M.; Nguyen, H.; Amara, P.; Yokoyama, K.; Nicolet, Y.; Mettal, U.; Schäberle, T. F. Genome- and metabolome-guided discovery of marine BamA inhibitors revealed a dedicated darobactin halogenase. *Cell Chem. Biol.* **2023**, *30*, 943–952.
3. Freeman, M. F.; Gurgui, C.; Helf, M. J.; Morinaka, B. I.; Uria, A. R.; Oldham, N. J.; Sahl, H. G.; Matsunaga, S.; Piel, J. Metagenome mining reveals polytheonamides as posttranslationally modified ribosomal peptides. *Science* **2012**, *338*, 387–390.
4. Huo, L.; Ökesli, A.; Zhao, M.; van der Donk, W. A. Insights into the Biosynthesis of Duramycin. *Appl. Environ. Microbiol.* **2017**, *83*, e02698-16.
5. Zhang, C.; Seyedsayamdost, M. R. CanE, an Iron/2-Oxoglutarate-Dependent Lasso Peptide Hydroxylase from *Streptomyces canus*. *ACS Chem. Biol.* **2020**, *15*, 890–894.
6. Sugiyama, R.; Suarez, A. F. L.; Morishita, Y.; Nguyen, T. Q. N.; Tooh, Y. W.; Roslan, M. N. H. B.; Lo Choy, J.; Su, Q.; Goh, W. Y.; Gunawan, G. A.; Wong, F. T.; Morinaka, B. I. The Biosynthetic Landscape of Triceptides Reveals Radical SAM Enzymes That Catalyze Cyclophane Formation on Tyr- and His-Containing Motifs. *J. Am. Chem. Soc.* **2022**, *144*, 11580-11593
7. Kim, H. W.; Kang, S.; Kim, S.; Lee, H.; Hur, Y.; Song, W. J.; Oh, D. C.; Kim, S. Discovery of a Two-Step Enzyme Cascade Converting Aspartate to Aminomalonate in Peptide Natural Product Biosynthesis. *J. Am. Chem. Soc.* **2025**, *147*, 20909–20918.
8. Morishita, Y.; Ma, S.; De La Mora, E.; Li, H.; Chen, H.; Ji, X.; Usclat, A.; Amara, P.; Sugiyama, R.; Tooh, Y. W.; Gunawan, G.; Pérard, J.; Nicolet, Y.; Zhang, Q.; Morinaka, B. I. Fused radical SAM and  $\alpha$ KG-HExxH domain proteins contain a distinct structural fold and catalyse cyclophane formation and  $\beta$ -hydroxylation. *Nat. Chem.* **2024**, *16*, 1882–1893.
9. Ouyang, Y.; Yu, Y.; Zhu, L.; Nguyen, D. T.; van der Donk, W. A. Oxidative peptide backbone cleavage by a HexxH enzyme during RiPP biosynthesis. *J. Am. Chem. Soc.* **2026**, *148*, 3551-3561.
10. Shi, J.; Zhang, Y.; Ren, W. Q.; Shi, Y.; Wei, Y. Y.; Zhang, B.; Jiao, R. H.; Ge, H. M. Biosynthesis of collinodin unveils iterative oxidative and prenylation modifications. *ACS Catal.* **2025**, *15*, 6628-6639.
11. Madeira, F.; Madhusoodanan, N.; Lee, J.; Eusebi, A.; Niewielska, A.; Tivey, A. R. N.; Lopez, R.; Butcher, S. The EMBL-EBI Job Dispatcher sequence analysis tools framework in 2024. *Nucleic Acids Res.* **2024**, *52*, W521–W525.
12. Holm, L.; Laiho, A.; Törönen, P.; Salgado, M. DALI shines a light on remote homologs: One hundred discoveries. *Protein Sci.* **2023**, *32*, e4519.
13. Abramson, J.; Adler, J.; Dunger, J.; Evans, R.; Green, T.; Pritzel, A.; Ronneberger, O.; Willmore, L.; Ballard, A. J.; Bambrick, J.; Bodenstein, S. W.; Evans, D. A.; Hung, C. C.; O'Neill, M.; Reiman, D.; Tunyasuvunakool, K.; Wu, Z.; Žemgulytė, A.; Arvaniti, E.; Beattie, C.; Bertolli, O.; Bridgland, A.; Cherepanov, A.; Congreve, M.; Cowen-Rivers, A. I.; Cowie, A.; Figurnov, M.; Fuchs, F. B.; Gladman, H.; Jain, R.; Khan, Y. A.; Low, C. M. R.; Perlin, K.; Potapenko, A.; Savy, P.; Singh, S.; Stecula, A.; Thillaisundaram, A.; Tong, C.; Yakneen, S.; Zhong, E. D.; Zielinski, M.; Židek, A.; Bapst, V.; Kohli, P.; Jaderberg, M.; Hassabis, D.; Jumper, J. M. Accurate structure prediction of biomolecular interactions with AlphaFold 3. *Nature* **2024**, *630*, 493-500.
14. Corpet, F. Multiple sequence alignment with hierarchical clustering. *Nucleic Acids Res.* **1988**, *16*, 10881–10890.
15. Schnell, N.; Entian, K. D.; Schneider, U.; Götz, F.; Zähler, H.; Kellner, R.; Jung, G. Prepeptide sequence of epidermin, a ribosomally synthesized antibiotic with four sulphide-rings. *Nature* **1988**, *333*, 276–278.
16. Sikandar, A.; Lopatniuk, M.; Luzhetskyy, A.; Müller, R.; Koehnke, J. Total In Vitro Biosynthesis of the Thioamide Thioholgamide and Investigation of the Pathway. *J. Am. Chem. Soc.* **2022**, *144*, 5136–5144.
17. Wiebach, V.; Mainz, A.; Siegert, M. J.; Jungmann, N. A.; Lesquame, G.; Tirat, S.; Dreux-Zigha, A.; Aszodi, J.; Le Beller, D.; Süßmuth, R. D. The anti-staphylococcal lipolanthines are

- ribosomally synthesized lipopeptides. *Nat. Chem. Biol.* **2018**, *14*, 652–654.
18. Wang, S.; Lin, S.; Fang, Q.; Gyampoh, R.; Lu, Z.; Gao, Y.; Clarke, D. J.; Wu, K.; Trembleau, L.; Yu, Y.; Kyeremeh, K.; Milne, B. F.; Tabudravu, J.; Deng, H. A ribosomally synthesised and post-translationally modified peptide containing a  $\beta$ -enamino acid and a macrocyclic motif. *Nat. Commun.* **2022**, *13*, 5044.
  19. Ishikawa, N.; Tanaka, H.; Koyama, F.; Noguchi, H.; Wang, C. C.; Hotta, K.; Watanabe, K. Non-heme dioxygenase catalyzes atypical oxidations of 6,7-bicyclic systems to form the 6,6-quinolone core of viridicatin-type fungal alkaloids. *Angew. Chem. Int. Ed.* **2014**, *53*, 12880–12884.
  20. Meng, S.; Han, W.; Zhao, J.; Jian, X. H.; Pan, H. X.; Tang, G. L. A Six-Oxidase Cascade for Tandem C-H Bond Activation Revealed by Reconstitution of Bicyclomycin Biosynthesis. *Angew. Chem. Int. Ed.* **2018**, *57*, 719–723.
  21. Vynne, N. G.; Mansson, M.; Gram, L. Gene sequence based clustering assists in dereplication of *Pseudoalteromonas luteoviolacea* strains with identical inhibitory activity and antibiotic production. *Mar. Drugs* **2012**, *10*, 1729–1740.
